# Supplementary material for: An unusual co-crystal [(μ2-dcpm)Ag2(μ2-O2CH)(η2-NO3)]2·[(μ2-dcpm)2Ag4(μ2-NO3)4] and its connection to the selective decarboxylation of formic acid in the gas phase
Source: Royal Society of Chemistry journal article supplement (doi:10.1039/c6dt03700c), 2016-01-01
Supplement: c6dt03700c1.pdf [file c6dt03700c1.pdf]

# An unusual co-crystal $[(\mu_2\text{-dcpm})\text{Ag}_2(\mu_2\text{-O}_2\text{CH})(\eta^2\text{-NO}_3)]_2 \cdot [(\mu_2\text{-dcpm})_2\text{Ag}_4(\mu_2\text{-NO}_3)_4]$ and its connection to the selective decarboxylation of formic acid in the gas phase.

Athanasios Zavras,<sup>a</sup> Jonathan M. White<sup>a</sup> and Richard A. J. O'Hair<sup>\*a</sup>

## Supplementary Information

### Table of contents:

|                                                                                                                                                                                                                                                                                                                                                                                                                                                                                                  |    |
|--------------------------------------------------------------------------------------------------------------------------------------------------------------------------------------------------------------------------------------------------------------------------------------------------------------------------------------------------------------------------------------------------------------------------------------------------------------------------------------------------|----|
| <b>Figure S1.</b> A ball-and-stick representation of the asymmetric unit obtained using the Mercury CSD 3.7 program from the crystallographic information file of $[(\mu_2\text{-dcpm})\text{Ag}_2(\mu_2\text{-O}_2\text{CH})(\eta^2\text{-NO}_3)]_2 \cdot [(\mu_2\text{-dcpm})_2\text{Ag}_4(\mu_2\text{-NO}_3)_4]$ ( <b>1</b> ). Atom colour designation: light grey = silver; dark grey = carbon; orange = phosphorus; red = oxygen; blue = nitrogen. Hydrogen atoms omitted for clarity. .... | 2  |
| <b>Figure S2.</b> Triplicate experiments for pseudo-first order kinetics obtained in a LTQ 2D linear-ion trap quasi thermalized to 298 K for the ion-molecule reaction of $[\text{LAg}_2\text{H}]^+$ , <b>2b</b> , $m/z$ 625, with formic acid. The black dots are the plotted coordinates for the activation time (s) (x-axis) vs. $\ln(\text{Relative Intensity of } [\text{LAg}_2\text{H}]^+)$ (y-axis). The red line represents the linear trendline of best-fit using Excel. ....           | 3  |
| <b>Table S1.</b> Peak assignment for ions of low abundance found in the ESI mass spectra shown in Figure 1. ....                                                                                                                                                                                                                                                                                                                                                                                 | 4  |
| <b>Table S2.</b> Intermolecular contacts between $[(\mu_2\text{-dcpm})\text{Ag}_2(\mu_2\text{-O}_2\text{CH})(\eta^2\text{-NO}_3)]_2$ and $[(\mu_2\text{-dcpm})_2\text{Ag}_4(\mu_2\text{-NO}_3)_4]$ . ....                                                                                                                                                                                                                                                                                        | 5  |
| <b>Table S3.</b> Crystal data and structure refinement for <b>3</b> . ....                                                                                                                                                                                                                                                                                                                                                                                                                       | 6  |
| <b>Table S4.</b> Atomic coordinates ( $\times 10^4$ ) and equivalent isotropic displacement parameters ( $\text{\AA}^2 \times 10^3$ ) for <b>3</b> . $U(\text{eq})$ is defined as one third of the trace of the orthogonalized $U^{ij}$ tensor. ....                                                                                                                                                                                                                                             | 7  |
| <b>Table S5.</b> Bond lengths [ $\text{\AA}$ ] and angles [ $^\circ$ ] for <b>3</b> . ....                                                                                                                                                                                                                                                                                                                                                                                                       | 11 |
| <b>Table S6.</b> Anisotropic displacement parameters ( $\text{\AA}^2 \times 10^3$ ) for <b>3</b> . The anisotropic displacement factor exponent takes the form: $-2\pi^2 [h^2 a^{*2} U^{11} + \dots + 2 h k a^* b^* U^{12}]$ . ....                                                                                                                                                                                                                                                              | 23 |
| <b>Table S7.</b> Hydrogen coordinates ( $\times 10^4$ ) and isotropic displacement parameters ( $\text{\AA}^2 \times 10^3$ ) for <b>3</b> . ....                                                                                                                                                                                                                                                                                                                                                 | 27 |
| <b>Table S8.</b> Torsion angles [ $^\circ$ ] for <b>3</b> . ....                                                                                                                                                                                                                                                                                                                                                                                                                                 | 31 |

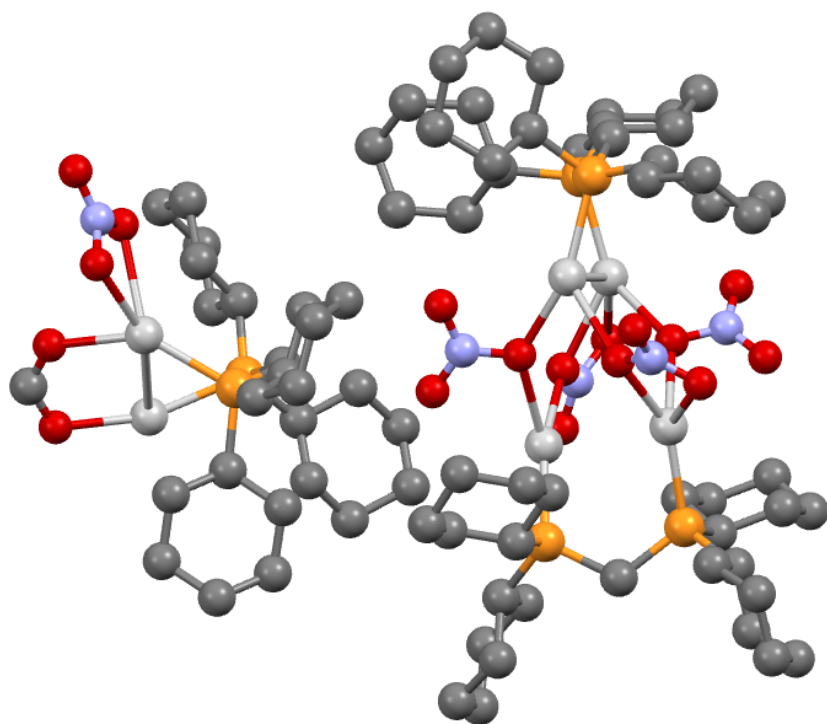

**Figure S1.** A ball-and-stick representation of the asymmetric unit obtained using the Mercury CSD 3.7 program from the crystallographic information file of  $[(\mu_2\text{-dcpm})\text{Ag}_2(\mu_2\text{-O}_2\text{CH})(\eta_2\text{-NO}_3)_2]_2 \cdot [(\mu_2\text{-dcpm})_2\text{Ag}_4(\mu_2\text{-NO}_3)_4]$  (**3**). Atom colour designation: light grey = silver; dark grey = carbon; orange = phosphorus; red = oxygen; blue = nitrogen. Hydrogen atoms omitted for clarity.

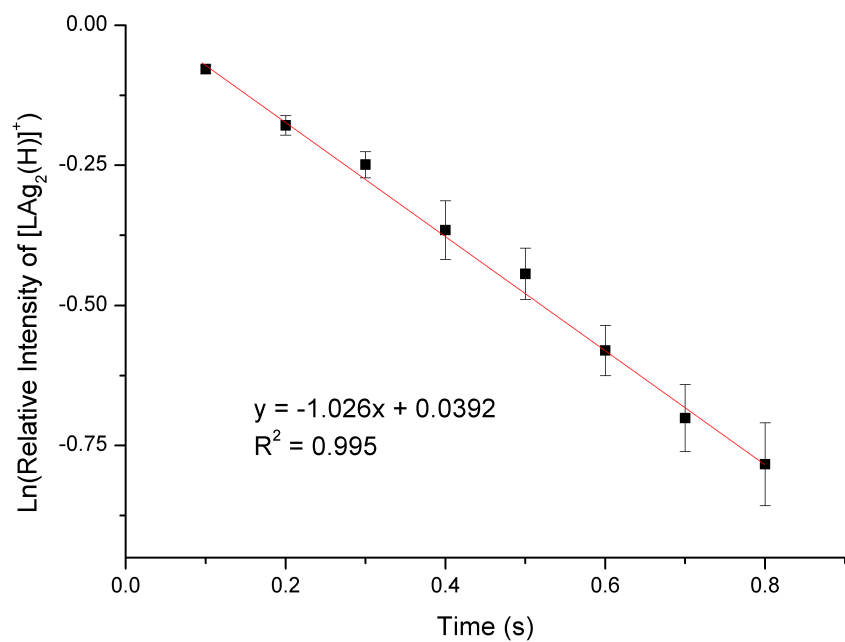

**Figure S2.** Triplicate experiments for pseudo-first order kinetics obtained in a LTQ 2D linear-ion trap quasi thermalized to 298 K for the ion-molecule reaction of [LAg<sub>2</sub>H]<sup>+</sup>, **2b**, *m/z* 625, with formic acid. The black dots are the plotted coordinates for the activation time (s) (x-axis) vs. ln(Relative Intensity of [LAg<sub>2</sub>H]<sup>+</sup>) (y-axis). The red line represents the linear trendline of best-fit using Excel.

**Table S1.** Peak assignment for ions of low abundance found in the ESI mass spectra shown in Figure 1.

| $m/z$ <sup>a</sup> | Ion                                                                                | Fig. 1a and/or 1b    |
|--------------------|------------------------------------------------------------------------------------|----------------------|
| 515                | [LAg] <sup>+</sup>                                                                 | 1b                   |
| 533                | [L(=O)Ag] <sup>+b</sup>                                                            | 1a, 1b               |
| 549                | [L(=O) <sub>2</sub> Ag] <sup>+b</sup>                                              | 1a, 1b               |
| 556                | [LAgCH <sub>3</sub> CN] <sup>+</sup>                                               | 1b                   |
| 572                | [L(=O)AgCH <sub>3</sub> CN] <sup>+b</sup>                                          | 1a, 1b               |
| 588                | [L(=O) <sub>2</sub> AgCH <sub>3</sub> CN] <sup>+b</sup>                            | 1a, 1b               |
| 625                | [LAg <sub>2</sub> H] <sup>+</sup>                                                  | 1b                   |
| 974                | [L <sub>2</sub> (=O) <sub>3</sub> Ag] <sup>+b</sup>                                | 1a, 1b               |
| 1126               | [L <sub>2</sub> (=O) <sub>2</sub> Ag <sub>2</sub> (NO <sub>3</sub> ) <sup>+b</sup> | 1a <sup>c</sup> , 1b |

<sup>a</sup> The most abundant peak of the isotope cluster is given. The isotope distributions are also consistent with the assignments.

<sup>b</sup> Peaks assigned with components “L<sub>x</sub>(=O)<sub>y</sub>” are likely due to partial (or complete) oxidation of the bisphosphine ligand(s) to the mono (or bis) oxide.

<sup>c</sup> The presence of [L(=O)<sub>2</sub>Ag<sub>2</sub>(NO<sub>3</sub>)<sup>+</sup> in Fig. 1a is likely from residual AgNO<sub>3</sub> in the ESI sample transfer capillary from prior experiments.

**Table S2.** Intermolecular contacts between  $[(\mu_2\text{-dcpm})\text{Ag}_2(\mu_2\text{-O}_2\text{CH})(\eta^2\text{-NO}_3)]_2$  and  $[(\mu_2\text{-dcpm})_2\text{Ag}_4(\mu_2\text{-NO}_3)_4]$ .

| Atom1  | Atom2  | Symm. op. 1 | Symm. op. 2        | Length (esd's?) |
|--------|--------|-------------|--------------------|-----------------|
| H(73B) | H(51B) | $x,y,z$     | $x,-1+y,z$         | 2.383           |
| H(60A) | H(44A) | $x,y,z$     | $x,-1+y,z$         | 2.283           |
| H(52)  | H(50A) | $x,y,z$     | $1-x,-1/2+y,1/2-z$ | 2.37            |
| H(72A) | O(13)  | $x,y,z$     | $1-x,-1/2+y,1/2-z$ | 2.707           |
| H(72B) | H(54A) | $x,y,z$     | $1-x,-1/2+y,1/2-z$ | 2.374           |
| H(65)  | O(14)  | $x,y,z$     | $1-x,-1/2+y,1/2-z$ | 2.414           |
| H(64A) | O(14)  | $x,y,z$     | $1-x,-1/2+y,1/2-z$ | 2.646           |
| H(61A) | O(8)   | $x,y,z$     | $x,-1/2-y,-1/2+z$  | 2.515           |
| O(11)  | H(8B)  | $x,y,z$     | $x,y,z$            | 2.54            |
| H(35A) | H(19B) | $x,y,z$     | $x,y,z$            | 2.287           |
| H(39A) | H(3A)  | $x,y,z$     | $x,1+y,z$          | 2.303           |
| H(39B) | O(5)   | $x,y,z$     | $x,1+y,z$          | 2.41            |
| H(33)  | O(5)   | $x,y,z$     | $x,1+y,z$          | 2.632           |
| H(45A) | O(4)   | $x,y,z$     | $x,1+y,z$          | 2.502           |
| H(35A) | O(3)   | $x,y,z$     | $-x,1/2+y,1/2-z$   | 2.582           |
| C(57)  | H(9B)  | $x,y,z$     | $x,-1/2-y,-1/2+z$  | 2.886           |
| H(29A) | H(24A) | $x,y,z$     | $-x,1/2+y,1/2-z$   | 2.357           |
| O(16)  | H(6A)  | $x,y,z$     | $x,-1/2-y,-1/2+z$  | 2.538           |
| O(16)  | H(9A)  | $x,y,z$     | $x,-1/2-y,-1/2+z$  | 2.685           |
| O(5)   | H(17B) | $x,y,z$     | $-x,-1/2+y,1/2-z$  | 2.65            |

**Table S3.** Crystal data and structure refinement for **3**.

|                                   |                                                                                                                                        |
|-----------------------------------|----------------------------------------------------------------------------------------------------------------------------------------|
| Identification code               | shelx                                                                                                                                  |
| Empirical formula                 | C76 H139 Ag6 N5 O17 P6                                                                                                                 |
| Formula weight                    | 2227.95                                                                                                                                |
| Temperature                       | 130.0(2) K                                                                                                                             |
| Wavelength                        | 1.5418 Å                                                                                                                               |
| Crystal system                    | Monoclinic                                                                                                                             |
| Space group                       | P 21/c                                                                                                                                 |
| Unit cell dimensions              | a = 24.6390(2) Å $\alpha = 90^\circ$ .<br>b = 16.08250(10) Å $\beta = 94.7980(10)^\circ$ .<br>c = 23.41430(10) Å $\gamma = 90^\circ$ . |
| Volume                            | 9245.56(10) Å <sup>3</sup>                                                                                                             |
| Z                                 | 4                                                                                                                                      |
| Density (calculated)              | 1.601 Mg/m <sup>3</sup>                                                                                                                |
| Absorption coefficient            | 11.484 mm <sup>-1</sup>                                                                                                                |
| F(000)                            | 4552                                                                                                                                   |
| Crystal size                      | 0.4939 x 0.0728 x 0.0600 mm <sup>3</sup>                                                                                               |
| Theta range for data collection   | 3.285 to 77.202°.                                                                                                                      |
| Index ranges                      | -30 ≤ h ≤ 31, -20 ≤ k ≤ 20, -29 ≤ l ≤ 27                                                                                               |
| Reflections collected             | 99896                                                                                                                                  |
| Independent reflections           | 19442 [R(int) = 0.0694]                                                                                                                |
| Completeness to theta = 67.684°   | 100.0 %                                                                                                                                |
| Absorption correction             | Gaussian                                                                                                                               |
| Max. and min. transmission        | 0.560 and 0.100                                                                                                                        |
| Refinement method                 | Full-matrix least-squares on F <sup>2</sup>                                                                                            |
| Data / restraints / parameters    | 19442 / 0 / 995                                                                                                                        |
| Goodness-of-fit on F <sup>2</sup> | 1.039                                                                                                                                  |
| Final R indices [I > 2σ(I)]       | R1 = 0.0449, wR2 = 0.1177                                                                                                              |
| R indices (all data)              | R1 = 0.0506, wR2 = 0.1226                                                                                                              |
| Extinction coefficient            | n/a                                                                                                                                    |
| Largest diff. peak and hole       | 1.873 and -1.681 e.Å <sup>-3</sup>                                                                                                     |

**Table S4.** Atomic coordinates (  $\times 10^4$ ) and equivalent isotropic displacement parameters ( $\text{\AA}^2 \times 10^3$ ) for **3**.  $U(\text{eq})$  is defined as one third of the trace of the orthogonalized  $U^{\text{ij}}$  tensor.

|       | x       | y        | z       | $U(\text{eq})$ |
|-------|---------|----------|---------|----------------|
| C(1)  | 2030(2) | -5269(2) | 4605(2) | 25(1)          |
| C(2)  | 1871(2) | -6046(3) | 4250(2) | 30(1)          |
| C(3)  | 2272(2) | -6752(3) | 4375(2) | 35(1)          |
| C(4)  | 2337(2) | -6965(3) | 5009(2) | 38(1)          |
| C(5)  | 2513(2) | -6198(3) | 5359(2) | 40(1)          |
| C(6)  | 2106(2) | -5486(3) | 5247(2) | 32(1)          |
| C(7)  | 1743(2) | -3527(3) | 4875(2) | 36(1)          |
| C(8)  | 2315(2) | -3249(3) | 4743(2) | 39(1)          |
| C(9)  | 2489(3) | -2458(4) | 5071(3) | 63(2)          |
| C(10) | 2092(3) | -1770(4) | 4961(3) | 64(2)          |
| C(11) | 1520(3) | -2052(4) | 5117(3) | 65(2)          |
| C(12) | 1347(2) | -2825(3) | 4771(3) | 52(1)          |
| C(13) | 1480(2) | -4182(3) | 3722(2) | 29(1)          |
| C(14) | 338(2)  | -3687(3) | 3648(2) | 29(1)          |
| C(15) | -255(2) | -4002(3) | 3574(2) | 34(1)          |
| C(16) | -631(2) | -3447(4) | 3897(2) | 45(1)          |
| C(17) | -587(2) | -2544(4) | 3721(2) | 48(1)          |
| C(18) | 0(2)    | -2236(3) | 3793(2) | 45(1)          |
| C(19) | 371(2)  | -2778(3) | 3458(2) | 38(1)          |
| C(20) | 903(2)  | -4016(3) | 2604(2) | 32(1)          |
| C(21) | 1370(2) | -4469(3) | 2343(2) | 41(1)          |
| C(22) | 1426(2) | -4162(4) | 1729(2) | 50(1)          |
| C(23) | 897(3)  | -4240(4) | 1353(2) | 60(2)          |
| C(24) | 446(2)  | -3771(5) | 1618(2) | 62(2)          |
| C(25) | 370(2)  | -4096(4) | 2222(2) | 49(1)          |
| C(26) | -79(3)  | -6483(4) | 4447(3) | 59(2)          |
| C(27) | 1543(2) | 227(3)   | 4099(2) | 34(1)          |
| C(28) | 1049(2) | 804(3)   | 4016(2) | 42(1)          |
| C(29) | 733(2)  | 798(5)   | 4556(2) | 58(2)          |
| C(30) | 1099(3) | 1056(4)  | 5086(2) | 59(2)          |
| C(31) | 1599(2) | 509(4)   | 5166(2) | 55(1)          |
| C(32) | 1915(2) | 493(3)   | 4627(2) | 41(1)          |
| C(33) | 1456(2) | -144(2)  | 2851(2) | 30(1)          |

|       |         |          |         |       |
|-------|---------|----------|---------|-------|
| C(34) | 1124(2) | -921(3)  | 2967(2) | 43(1) |
| C(35) | 766(2)  | -1174(4) | 2429(3) | 57(2) |
| C(36) | 1106(3) | -1335(4) | 1928(3) | 60(2) |
| C(37) | 1427(2) | -563(3)  | 1797(2) | 46(1) |
| C(38) | 1783(2) | -277(3)  | 2321(2) | 36(1) |
| C(39) | 2128(2) | 1205(2)  | 3320(2) | 26(1) |
| C(40) | 2636(2) | 2256(2)  | 2512(2) | 26(1) |
| C(41) | 2244(2) | 2024(3)  | 1997(2) | 31(1) |
| C(42) | 2156(2) | 2759(3)  | 1581(2) | 39(1) |
| C(43) | 1960(2) | 3524(3)  | 1886(2) | 39(1) |
| C(44) | 2355(2) | 3756(3)  | 2399(2) | 39(1) |
| C(45) | 2438(2) | 3029(2)  | 2815(2) | 28(1) |
| C(46) | 3245(2) | 1726(2)  | 3586(2) | 26(1) |
| C(47) | 3408(2) | 1010(3)  | 3996(2) | 34(1) |
| C(48) | 3812(2) | 1288(4)  | 4483(2) | 46(1) |
| C(49) | 4318(2) | 1685(4)  | 4258(2) | 47(1) |
| C(50) | 4156(2) | 2403(3)  | 3860(2) | 41(1) |
| C(51) | 3757(2) | 2118(3)  | 3361(2) | 31(1) |
| C(52) | 4275(2) | -2408(2) | 1159(2) | 28(1) |
| C(53) | 4441(2) | -1520(3) | 1350(2) | 34(1) |
| C(54) | 4623(2) | -1000(3) | 851(2)  | 43(1) |
| C(55) | 4183(2) | -973(3)  | 356(2)  | 48(1) |
| C(56) | 4028(2) | -1851(3) | 162(2)  | 47(1) |
| C(57) | 3843(2) | -2373(3) | 654(2)  | 32(1) |
| C(58) | 3789(2) | -4024(3) | 1537(2) | 30(1) |
| C(59) | 3196(2) | -4055(3) | 1291(2) | 36(1) |
| C(60) | 3003(2) | -4952(4) | 1215(2) | 49(1) |
| C(61) | 3371(2) | -5446(3) | 847(2)  | 48(1) |
| C(62) | 3974(3) | -5392(3) | 1071(2) | 51(1) |
| C(63) | 4160(2) | -4487(3) | 1149(2) | 35(1) |
| C(64) | 4626(2) | -3165(3) | 2253(2) | 28(1) |
| C(65) | 5180(1) | -3338(2) | 3383(2) | 24(1) |
| C(66) | 5586(2) | -2670(3) | 3222(2) | 30(1) |
| C(67) | 6145(2) | -2783(3) | 3545(2) | 40(1) |
| C(68) | 6102(2) | -2804(3) | 4192(2) | 39(1) |
| C(69) | 5712(2) | -3483(3) | 4349(2) | 41(1) |
| C(70) | 5149(2) | -3372(3) | 4035(2) | 32(1) |
| C(71) | 4040(2) | -3978(2) | 3113(2) | 26(1) |



|       |         |          |         |       |
|-------|---------|----------|---------|-------|
| C(72) | 4297(2) | -4838(3) | 3064(2) | 34(1) |
| C(73) | 3875(3) | -5524(3) | 3106(2) | 52(1) |
| C(74) | 3598(3) | -5446(4) | 3659(3) | 62(2) |
| C(75) | 3335(2) | -4599(4) | 3703(2) | 57(2) |
| C(76) | 3745(2) | -3891(3) | 3663(2) | 37(1) |
| N(1)  | 855(1)  | -7409(2) | 2943(1) | 30(1) |
| N(2)  | 3684(2) | -1175(3) | 4353(2) | 50(1) |
| N(3)  | 2472(2) | -2554(2) | 2983(2) | 41(1) |
| N(4)  | 4354(2) | -190(3)  | 2789(2) | 42(1) |
| N(5)  | 2994(2) | -590(3)  | 1425(2) | 47(1) |
| O(1)  | -37(1)  | -5826(2) | 4747(2) | 43(1) |
| O(2)  | 160(2)  | -6670(3) | 4034(2) | 66(1) |
| O(3)  | 456(1)  | -6967(2) | 2763(2) | 45(1) |
| O(4)  | 1173(1) | -7127(2) | 3344(1) | 39(1) |
| O(5)  | 939(1)  | -8091(2) | 2725(1) | 41(1) |
| O(6)  | 3447(1) | -1409(2) | 3874(1) | 45(1) |
| O(7)  | 4202(2) | -1272(4) | 4395(3) | 94(2) |
| O(8)  | 3418(2) | -859(3)  | 4704(2) | 73(1) |
| O(9)  | 2785(1) | -1947(2) | 2878(2) | 42(1) |
| O(10) | 2508(2) | -3192(3) | 2710(3) | 86(2) |
| O(11) | 2160(2) | -2452(3) | 3362(2) | 59(1) |
| O(12) | 3918(1) | -596(2)  | 2850(2) | 55(1) |
| O(13) | 4793(2) | -500(3)  | 2964(3) | 77(1) |
| O(14) | 4310(2) | 487(3)   | 2557(2) | 62(1) |
| O(15) | 2976(2) | -900(2)  | 1915(2) | 55(1) |
| O(16) | 2879(2) | -1013(3) | 1001(2) | 90(2) |
| O(17) | 3146(3) | 140(3)   | 1404(2) | 82(2) |
| P(1)  | 1497(1) | -4473(1) | 4487(1) | 24(1) |
| P(2)  | 815(1)  | -4410(1) | 3332(1) | 25(1) |
| P(3)  | 1937(1) | 125(1)   | 3467(1) | 25(1) |
| P(4)  | 2775(1) | 1353(1)  | 2987(1) | 22(1) |
| P(5)  | 4012(1) | -2969(1) | 1766(1) | 23(1) |
| P(6)  | 4505(1) | -3101(1) | 3015(1) | 21(1) |
| Ag(1) | 658(1)  | -5017(1) | 4701(1) | 33(1) |
| Ag(2) | 602(1)  | -5829(1) | 3436(1) | 34(1) |
| Ag(3) | 2653(1) | -840(1)  | 3579(1) | 33(1) |
| Ag(4) | 3154(1) | 226(1)   | 2531(1) | 34(1) |
| Ag(5) | 3338(1) | -2226(1) | 2192(1) | 35(1) |

Ag(6)

4139(1)

-1851(1)

3303(1)

39(1)

---

**Table S5.** Bond lengths [ $\text{\AA}$ ] and angles [ $^\circ$ ] for **3**.

---

|              |           |              |          |
|--------------|-----------|--------------|----------|
| C(1)-C(2)    | 1.534(5)  | C(12)-H(12B) | 0.9700   |
| C(1)-C(6)    | 1.540(5)  | C(13)-P(2)   | 1.845(4) |
| C(1)-P(1)    | 1.840(4)  | C(13)-P(1)   | 1.847(4) |
| C(1)-H(1)    | 0.9800    | C(13)-H(13A) | 0.9700   |
| C(2)-C(3)    | 1.517(5)  | C(13)-H(13B) | 0.9700   |
| C(2)-H(2A)   | 0.9700    | C(14)-C(19)  | 1.532(6) |
| C(2)-H(2B)   | 0.9700    | C(14)-C(15)  | 1.543(5) |
| C(3)-C(4)    | 1.519(6)  | C(14)-P(2)   | 1.851(4) |
| C(3)-H(3A)   | 0.9700    | C(14)-H(14)  | 0.9800   |
| C(3)-H(3B)   | 0.9700    | C(15)-C(16)  | 1.531(6) |
| C(4)-C(5)    | 1.523(6)  | C(15)-H(15A) | 0.9700   |
| C(4)-H(4A)   | 0.9700    | C(15)-H(15B) | 0.9700   |
| C(4)-H(4B)   | 0.9700    | C(16)-C(17)  | 1.515(8) |
| C(5)-C(6)    | 1.531(6)  | C(16)-H(16A) | 0.9700   |
| C(5)-H(5A)   | 0.9700    | C(16)-H(16B) | 0.9700   |
| C(5)-H(5B)   | 0.9700    | C(17)-C(18)  | 1.523(8) |
| C(6)-H(6A)   | 0.9700    | C(17)-H(17A) | 0.9700   |
| C(6)-H(6B)   | 0.9700    | C(17)-H(17B) | 0.9700   |
| C(7)-C(12)   | 1.498(7)  | C(18)-C(19)  | 1.528(6) |
| C(7)-C(8)    | 1.533(6)  | C(18)-H(18A) | 0.9700   |
| C(7)-P(1)    | 1.848(4)  | C(18)-H(18B) | 0.9700   |
| C(7)-H(7)    | 0.9800    | C(19)-H(19A) | 0.9700   |
| C(8)-C(9)    | 1.528(7)  | C(19)-H(19B) | 0.9700   |
| C(8)-H(8A)   | 0.9700    | C(20)-C(21)  | 1.531(6) |
| C(8)-H(8B)   | 0.9700    | C(20)-C(25)  | 1.531(6) |
| C(9)-C(10)   | 1.485(9)  | C(20)-P(2)   | 1.847(4) |
| C(9)-H(9A)   | 0.9700    | C(20)-H(20)  | 0.9800   |
| C(9)-H(9B)   | 0.9700    | C(21)-C(22)  | 1.538(7) |
| C(10)-C(11)  | 1.553(10) | C(21)-H(21A) | 0.9700   |
| C(10)-H(10A) | 0.9700    | C(21)-H(21B) | 0.9700   |
| C(10)-H(10B) | 0.9700    | C(22)-C(23)  | 1.514(9) |
| C(11)-C(12)  | 1.526(8)  | C(22)-H(22A) | 0.9700   |
| C(11)-H(11A) | 0.9700    | C(22)-H(22B) | 0.9700   |
| C(11)-H(11B) | 0.9700    | C(23)-C(24)  | 1.519(9) |
| C(12)-H(12A) | 0.9700    | C(23)-H(23A) | 0.9700   |

|              |          |              |          |
|--------------|----------|--------------|----------|
| C(23)-H(23B) | 0.9700   | C(36)-H(36A) | 0.9700   |
| C(24)-C(25)  | 1.532(7) | C(36)-H(36B) | 0.9700   |
| C(24)-H(24A) | 0.9700   | C(37)-C(38)  | 1.519(6) |
| C(24)-H(24B) | 0.9700   | C(37)-H(37A) | 0.9700   |
| C(25)-H(25A) | 0.9700   | C(37)-H(37B) | 0.9700   |
| C(25)-H(25B) | 0.9700   | C(38)-H(38A) | 0.9700   |
| C(26)-O(2)   | 1.212(7) | C(38)-H(38B) | 0.9700   |
| C(26)-O(1)   | 1.269(6) | C(39)-P(3)   | 1.841(4) |
| C(26)-H      | 1.11(8)  | C(39)-P(4)   | 1.846(4) |
| C(27)-C(28)  | 1.530(6) | C(39)-H(39A) | 0.9700   |
| C(27)-C(32)  | 1.539(6) | C(39)-H(39B) | 0.9700   |
| C(27)-P(3)   | 1.844(4) | C(40)-C(41)  | 1.528(5) |
| C(27)-H(27)  | 0.9800   | C(40)-C(45)  | 1.532(5) |
| C(28)-C(29)  | 1.540(6) | C(40)-P(4)   | 1.843(4) |
| C(28)-H(28A) | 0.9700   | C(40)-H(40)  | 0.9800   |
| C(28)-H(28B) | 0.9700   | C(41)-C(42)  | 1.536(6) |
| C(29)-C(30)  | 1.529(9) | C(41)-H(41A) | 0.9700   |
| C(29)-H(29A) | 0.9700   | C(41)-H(41B) | 0.9700   |
| C(29)-H(29B) | 0.9700   | C(42)-C(43)  | 1.523(7) |
| C(30)-C(31)  | 1.511(8) | C(42)-H(42A) | 0.9700   |
| C(30)-H(30A) | 0.9700   | C(42)-H(42B) | 0.9700   |
| C(30)-H(30B) | 0.9700   | C(43)-C(44)  | 1.527(6) |
| C(31)-C(32)  | 1.538(7) | C(43)-H(43A) | 0.9700   |
| C(31)-H(31A) | 0.9700   | C(43)-H(43B) | 0.9700   |
| C(31)-H(31B) | 0.9700   | C(44)-C(45)  | 1.524(5) |
| C(32)-H(32A) | 0.9700   | C(44)-H(44A) | 0.9700   |
| C(32)-H(32B) | 0.9700   | C(44)-H(44B) | 0.9700   |
| C(33)-C(34)  | 1.531(6) | C(45)-H(45A) | 0.9700   |
| C(33)-C(38)  | 1.549(6) | C(45)-H(45B) | 0.9700   |
| C(33)-P(3)   | 1.839(4) | C(46)-C(47)  | 1.532(5) |
| C(33)-H(33)  | 0.9800   | C(46)-C(51)  | 1.542(5) |
| C(34)-C(35)  | 1.531(7) | C(46)-P(4)   | 1.842(4) |
| C(34)-H(34A) | 0.9700   | C(46)-H(46)  | 0.9800   |
| C(34)-H(34B) | 0.9700   | C(47)-C(48)  | 1.517(6) |
| C(35)-C(36)  | 1.521(9) | C(47)-H(47A) | 0.9700   |
| C(35)-H(35A) | 0.9700   | C(47)-H(47B) | 0.9700   |
| C(35)-H(35B) | 0.9700   | C(48)-C(49)  | 1.532(7) |
| C(36)-C(37)  | 1.517(8) | C(48)-H(48A) | 0.9700   |

|              |          |              |          |
|--------------|----------|--------------|----------|
| C(48)-H(48B) | 0.9700   | C(61)-H(61A) | 0.9700   |
| C(49)-C(50)  | 1.517(7) | C(61)-H(61B) | 0.9700   |
| C(49)-H(49A) | 0.9700   | C(62)-C(63)  | 1.532(6) |
| C(49)-H(49B) | 0.9700   | C(62)-H(62A) | 0.9700   |
| C(50)-C(51)  | 1.533(6) | C(62)-H(62B) | 0.9700   |
| C(50)-H(50A) | 0.9700   | C(63)-H(63A) | 0.9700   |
| C(50)-H(50B) | 0.9700   | C(63)-H(63B) | 0.9700   |
| C(51)-H(51A) | 0.9700   | C(64)-P(6)   | 1.837(4) |
| C(51)-H(51B) | 0.9700   | C(64)-P(5)   | 1.843(4) |
| C(52)-C(57)  | 1.525(5) | C(64)-H(64A) | 0.9700   |
| C(52)-C(53)  | 1.542(5) | C(64)-H(64B) | 0.9700   |
| C(52)-P(5)   | 1.846(4) | C(65)-C(70)  | 1.535(5) |
| C(52)-H(52)  | 0.9800   | C(65)-C(66)  | 1.537(5) |
| C(53)-C(54)  | 1.534(6) | C(65)-P(6)   | 1.848(4) |
| C(53)-H(53A) | 0.9700   | C(65)-H(65)  | 0.9800   |
| C(53)-H(53B) | 0.9700   | C(66)-C(67)  | 1.525(6) |
| C(54)-C(55)  | 1.521(7) | C(66)-H(66A) | 0.9700   |
| C(54)-H(54A) | 0.9700   | C(66)-H(66B) | 0.9700   |
| C(54)-H(54B) | 0.9700   | C(67)-C(68)  | 1.529(7) |
| C(55)-C(56)  | 1.522(7) | C(67)-H(67A) | 0.9700   |
| C(55)-H(55A) | 0.9700   | C(67)-H(67B) | 0.9700   |
| C(55)-H(55B) | 0.9700   | C(68)-C(69)  | 1.519(7) |
| C(56)-C(57)  | 1.525(6) | C(68)-H(68A) | 0.9700   |
| C(56)-H(56A) | 0.9700   | C(68)-H(68B) | 0.9700   |
| C(56)-H(56B) | 0.9700   | C(69)-C(70)  | 1.526(6) |
| C(57)-H(57A) | 0.9700   | C(69)-H(69A) | 0.9700   |
| C(57)-H(57B) | 0.9700   | C(69)-H(69B) | 0.9700   |
| C(58)-C(59)  | 1.526(6) | C(70)-H(70A) | 0.9700   |
| C(58)-C(63)  | 1.534(6) | C(70)-H(70B) | 0.9700   |
| C(58)-P(5)   | 1.849(4) | C(71)-C(72)  | 1.530(6) |
| C(58)-H(58)  | 0.9800   | C(71)-C(76)  | 1.538(5) |
| C(59)-C(60)  | 1.526(7) | C(71)-P(6)   | 1.843(4) |
| C(59)-H(59A) | 0.9700   | C(71)-H(71)  | 0.9800   |
| C(59)-H(59B) | 0.9700   | C(72)-C(73)  | 1.525(6) |
| C(60)-C(61)  | 1.526(8) | C(72)-H(72A) | 0.9700   |
| C(60)-H(60A) | 0.9700   | C(72)-H(72B) | 0.9700   |
| C(60)-H(60B) | 0.9700   | C(73)-C(74)  | 1.518(8) |
| C(61)-C(62)  | 1.535(8) | C(73)-H(73A) | 0.9700   |

|              |           |                  |            |
|--------------|-----------|------------------|------------|
| C(73)-H(73B) | 0.9700    | P(2)-Ag(2)       | 2.3591(10) |
| C(74)-C(75)  | 1.515(10) | P(3)-Ag(3)       | 2.3473(10) |
| C(74)-H(74A) | 0.9700    | P(4)-Ag(4)       | 2.3380(9)  |
| C(74)-H(74B) | 0.9700    | P(5)-Ag(5)       | 2.3368(9)  |
| C(75)-C(76)  | 1.529(6)  | P(6)-Ag(6)       | 2.3255(9)  |
| C(75)-H(75A) | 0.9700    | Ag(1)-O(1)#1     | 2.485(3)   |
| C(75)-H(75B) | 0.9700    | Ag(1)-Ag(2)      | 3.2294(4)  |
| C(76)-H(76A) | 0.9700    | Ag(3)-Ag(4)      | 3.3148(4)  |
| C(76)-H(76B) | 0.9700    | Ag(5)-Ag(6)      | 3.1892(4)  |
| N(1)-O(5)    | 1.233(5)  |                  |            |
| N(1)-O(4)    | 1.256(5)  | C(2)-C(1)-C(6)   | 110.4(3)   |
| N(1)-O(3)    | 1.257(5)  | C(2)-C(1)-P(1)   | 109.8(3)   |
| N(2)-O(8)    | 1.204(6)  | C(6)-C(1)-P(1)   | 109.3(3)   |
| N(2)-O(6)    | 1.277(6)  | C(2)-C(1)-H(1)   | 109.1      |
| N(2)-O(7)    | 1.281(7)  | C(6)-C(1)-H(1)   | 109.1      |
| N(3)-O(10)   | 1.216(6)  | P(1)-C(1)-H(1)   | 109.1      |
| N(3)-O(11)   | 1.232(5)  | C(3)-C(2)-C(1)   | 111.8(3)   |
| N(3)-O(9)    | 1.280(5)  | C(3)-C(2)-H(2A)  | 109.3      |
| N(4)-O(14)   | 1.218(6)  | C(1)-C(2)-H(2A)  | 109.3      |
| N(4)-O(13)   | 1.231(6)  | C(3)-C(2)-H(2B)  | 109.3      |
| N(4)-O(12)   | 1.275(5)  | C(1)-C(2)-H(2B)  | 109.3      |
| N(5)-O(16)   | 1.217(6)  | H(2A)-C(2)-H(2B) | 107.9      |
| N(5)-O(17)   | 1.235(7)  | C(2)-C(3)-C(4)   | 111.8(3)   |
| N(5)-O(15)   | 1.257(6)  | C(2)-C(3)-H(3A)  | 109.3      |
| O(1)-Ag(1)   | 2.161(3)  | C(4)-C(3)-H(3A)  | 109.3      |
| O(1)-Ag(1)#1 | 2.485(3)  | C(2)-C(3)-H(3B)  | 109.3      |
| O(2)-Ag(2)   | 2.288(4)  | C(4)-C(3)-H(3B)  | 109.3      |
| O(3)-Ag(2)   | 2.423(3)  | H(3A)-C(3)-H(3B) | 107.9      |
| O(4)-Ag(2)   | 2.536(3)  | C(3)-C(4)-C(5)   | 110.2(4)   |
| O(6)-Ag(3)   | 2.217(3)  | C(3)-C(4)-H(4A)  | 109.6      |
| O(6)-Ag(6)   | 2.362(3)  | C(5)-C(4)-H(4A)  | 109.6      |
| O(9)-Ag(5)   | 2.236(3)  | C(3)-C(4)-H(4B)  | 109.6      |
| O(9)-Ag(3)   | 2.462(3)  | C(5)-C(4)-H(4B)  | 109.6      |
| O(12)-Ag(6)  | 2.324(4)  | H(4A)-C(4)-H(4B) | 108.1      |
| O(12)-Ag(4)  | 2.367(3)  | C(4)-C(5)-C(6)   | 111.1(4)   |
| O(15)-Ag(4)  | 2.333(4)  | C(4)-C(5)-H(5A)  | 109.4      |
| O(15)-Ag(5)  | 2.379(4)  | C(6)-C(5)-H(5A)  | 109.4      |
| P(1)-Ag(1)   | 2.3364(9) | C(4)-C(5)-H(5B)  | 109.4      |

|                     |          |                     |          |
|---------------------|----------|---------------------|----------|
| C(6)-C(5)-H(5B)     | 109.4    | C(7)-C(12)-C(11)    | 112.2(5) |
| H(5A)-C(5)-H(5B)    | 108.0    | C(7)-C(12)-H(12A)   | 109.2    |
| C(5)-C(6)-C(1)      | 111.1(3) | C(11)-C(12)-H(12A)  | 109.2    |
| C(5)-C(6)-H(6A)     | 109.4    | C(7)-C(12)-H(12B)   | 109.2    |
| C(1)-C(6)-H(6A)     | 109.4    | C(11)-C(12)-H(12B)  | 109.2    |
| C(5)-C(6)-H(6B)     | 109.4    | H(12A)-C(12)-H(12B) | 107.9    |
| C(1)-C(6)-H(6B)     | 109.4    | P(2)-C(13)-P(1)     | 112.2(2) |
| H(6A)-C(6)-H(6B)    | 108.0    | P(2)-C(13)-H(13A)   | 109.2    |
| C(12)-C(7)-C(8)     | 110.1(4) | P(1)-C(13)-H(13A)   | 109.2    |
| C(12)-C(7)-P(1)     | 110.9(3) | P(2)-C(13)-H(13B)   | 109.2    |
| C(8)-C(7)-P(1)      | 114.3(3) | P(1)-C(13)-H(13B)   | 109.2    |
| C(12)-C(7)-H(7)     | 107.1    | H(13A)-C(13)-H(13B) | 107.9    |
| C(8)-C(7)-H(7)      | 107.1    | C(19)-C(14)-C(15)   | 110.7(3) |
| P(1)-C(7)-H(7)      | 107.1    | C(19)-C(14)-P(2)    | 115.6(3) |
| C(9)-C(8)-C(7)      | 111.5(5) | C(15)-C(14)-P(2)    | 112.1(3) |
| C(9)-C(8)-H(8A)     | 109.3    | C(19)-C(14)-H(14)   | 105.9    |
| C(7)-C(8)-H(8A)     | 109.3    | C(15)-C(14)-H(14)   | 105.9    |
| C(9)-C(8)-H(8B)     | 109.3    | P(2)-C(14)-H(14)    | 105.9    |
| C(7)-C(8)-H(8B)     | 109.3    | C(16)-C(15)-C(14)   | 111.0(4) |
| H(8A)-C(8)-H(8B)    | 108.0    | C(16)-C(15)-H(15A)  | 109.4    |
| C(10)-C(9)-C(8)     | 112.3(5) | C(14)-C(15)-H(15A)  | 109.4    |
| C(10)-C(9)-H(9A)    | 109.2    | C(16)-C(15)-H(15B)  | 109.4    |
| C(8)-C(9)-H(9A)     | 109.2    | C(14)-C(15)-H(15B)  | 109.4    |
| C(10)-C(9)-H(9B)    | 109.2    | H(15A)-C(15)-H(15B) | 108.0    |
| C(8)-C(9)-H(9B)     | 109.2    | C(17)-C(16)-C(15)   | 111.4(4) |
| H(9A)-C(9)-H(9B)    | 107.9    | C(17)-C(16)-H(16A)  | 109.3    |
| C(9)-C(10)-C(11)    | 109.8(5) | C(15)-C(16)-H(16A)  | 109.3    |
| C(9)-C(10)-H(10A)   | 109.7    | C(17)-C(16)-H(16B)  | 109.3    |
| C(11)-C(10)-H(10A)  | 109.7    | C(15)-C(16)-H(16B)  | 109.3    |
| C(9)-C(10)-H(10B)   | 109.7    | H(16A)-C(16)-H(16B) | 108.0    |
| C(11)-C(10)-H(10B)  | 109.7    | C(16)-C(17)-C(18)   | 111.7(4) |
| H(10A)-C(10)-H(10B) | 108.2    | C(16)-C(17)-H(17A)  | 109.3    |
| C(12)-C(11)-C(10)   | 109.3(5) | C(18)-C(17)-H(17A)  | 109.3    |
| C(12)-C(11)-H(11A)  | 109.8    | C(16)-C(17)-H(17B)  | 109.3    |
| C(10)-C(11)-H(11A)  | 109.8    | C(18)-C(17)-H(17B)  | 109.3    |
| C(12)-C(11)-H(11B)  | 109.8    | H(17A)-C(17)-H(17B) | 107.9    |
| C(10)-C(11)-H(11B)  | 109.8    | C(17)-C(18)-C(19)   | 111.1(4) |
| H(11A)-C(11)-H(11B) | 108.3    | C(17)-C(18)-H(18A)  | 109.4    |

|                     |          |                     |          |
|---------------------|----------|---------------------|----------|
| C(19)-C(18)-H(18A)  | 109.4    | C(25)-C(24)-H(24B)  | 109.4    |
| C(17)-C(18)-H(18B)  | 109.4    | H(24A)-C(24)-H(24B) | 108.0    |
| C(19)-C(18)-H(18B)  | 109.4    | C(20)-C(25)-C(24)   | 110.2(4) |
| H(18A)-C(18)-H(18B) | 108.0    | C(20)-C(25)-H(25A)  | 109.6    |
| C(18)-C(19)-C(14)   | 110.2(4) | C(24)-C(25)-H(25A)  | 109.6    |
| C(18)-C(19)-H(19A)  | 109.6    | C(20)-C(25)-H(25B)  | 109.6    |
| C(14)-C(19)-H(19A)  | 109.6    | C(24)-C(25)-H(25B)  | 109.6    |
| C(18)-C(19)-H(19B)  | 109.6    | H(25A)-C(25)-H(25B) | 108.1    |
| C(14)-C(19)-H(19B)  | 109.6    | O(2)-C(26)-O(1)     | 128.8(5) |
| H(19A)-C(19)-H(19B) | 108.1    | O(2)-C(26)-H        | 117(4)   |
| C(21)-C(20)-C(25)   | 111.4(4) | O(1)-C(26)-H        | 114(4)   |
| C(21)-C(20)-P(2)    | 110.8(3) | C(28)-C(27)-C(32)   | 110.4(4) |
| C(25)-C(20)-P(2)    | 110.4(3) | C(28)-C(27)-P(3)    | 114.9(3) |
| C(21)-C(20)-H(20)   | 108.0    | C(32)-C(27)-P(3)    | 110.6(3) |
| C(25)-C(20)-H(20)   | 108.0    | C(28)-C(27)-H(27)   | 106.9    |
| P(2)-C(20)-H(20)    | 108.0    | C(32)-C(27)-H(27)   | 106.9    |
| C(20)-C(21)-C(22)   | 110.4(4) | P(3)-C(27)-H(27)    | 106.9    |
| C(20)-C(21)-H(21A)  | 109.6    | C(27)-C(28)-C(29)   | 110.1(4) |
| C(22)-C(21)-H(21A)  | 109.6    | C(27)-C(28)-H(28A)  | 109.6    |
| C(20)-C(21)-H(21B)  | 109.6    | C(29)-C(28)-H(28A)  | 109.6    |
| C(22)-C(21)-H(21B)  | 109.6    | C(27)-C(28)-H(28B)  | 109.6    |
| H(21A)-C(21)-H(21B) | 108.1    | C(29)-C(28)-H(28B)  | 109.6    |
| C(23)-C(22)-C(21)   | 112.1(4) | H(28A)-C(28)-H(28B) | 108.2    |
| C(23)-C(22)-H(22A)  | 109.2    | C(30)-C(29)-C(28)   | 111.1(5) |
| C(21)-C(22)-H(22A)  | 109.2    | C(30)-C(29)-H(29A)  | 109.4    |
| C(23)-C(22)-H(22B)  | 109.2    | C(28)-C(29)-H(29A)  | 109.4    |
| C(21)-C(22)-H(22B)  | 109.2    | C(30)-C(29)-H(29B)  | 109.4    |
| H(22A)-C(22)-H(22B) | 107.9    | C(28)-C(29)-H(29B)  | 109.4    |
| C(22)-C(23)-C(24)   | 110.2(4) | H(29A)-C(29)-H(29B) | 108.0    |
| C(22)-C(23)-H(23A)  | 109.6    | C(31)-C(30)-C(29)   | 111.3(5) |
| C(24)-C(23)-H(23A)  | 109.6    | C(31)-C(30)-H(30A)  | 109.4    |
| C(22)-C(23)-H(23B)  | 109.6    | C(29)-C(30)-H(30A)  | 109.4    |
| C(24)-C(23)-H(23B)  | 109.6    | C(31)-C(30)-H(30B)  | 109.4    |
| H(23A)-C(23)-H(23B) | 108.1    | C(29)-C(30)-H(30B)  | 109.4    |
| C(23)-C(24)-C(25)   | 111.0(5) | H(30A)-C(30)-H(30B) | 108.0    |
| C(23)-C(24)-H(24A)  | 109.4    | C(30)-C(31)-C(32)   | 111.8(4) |
| C(25)-C(24)-H(24A)  | 109.4    | C(30)-C(31)-H(31A)  | 109.3    |
| C(23)-C(24)-H(24B)  | 109.4    | C(32)-C(31)-H(31A)  | 109.3    |



|                     |          |                     |          |
|---------------------|----------|---------------------|----------|
| C(30)-C(31)-H(31B)  | 109.3    | H(37A)-C(37)-H(37B) | 108.0    |
| C(32)-C(31)-H(31B)  | 109.3    | C(37)-C(38)-C(33)   | 112.7(4) |
| H(31A)-C(31)-H(31B) | 107.9    | C(37)-C(38)-H(38A)  | 109.0    |
| C(31)-C(32)-C(27)   | 110.8(4) | C(33)-C(38)-H(38A)  | 109.0    |
| C(31)-C(32)-H(32A)  | 109.5    | C(37)-C(38)-H(38B)  | 109.0    |
| C(27)-C(32)-H(32A)  | 109.5    | C(33)-C(38)-H(38B)  | 109.0    |
| C(31)-C(32)-H(32B)  | 109.5    | H(38A)-C(38)-H(38B) | 107.8    |
| C(27)-C(32)-H(32B)  | 109.5    | P(3)-C(39)-P(4)     | 116.3(2) |
| H(32A)-C(32)-H(32B) | 108.1    | P(3)-C(39)-H(39A)   | 108.2    |
| C(34)-C(33)-C(38)   | 110.5(4) | P(4)-C(39)-H(39A)   | 108.2    |
| C(34)-C(33)-P(3)    | 111.8(3) | P(3)-C(39)-H(39B)   | 108.2    |
| C(38)-C(33)-P(3)    | 108.4(3) | P(4)-C(39)-H(39B)   | 108.2    |
| C(34)-C(33)-H(33)   | 108.7    | H(39A)-C(39)-H(39B) | 107.4    |
| C(38)-C(33)-H(33)   | 108.7    | C(41)-C(40)-C(45)   | 111.0(3) |
| P(3)-C(33)-H(33)    | 108.7    | C(41)-C(40)-P(4)    | 110.9(3) |
| C(33)-C(34)-C(35)   | 110.6(4) | C(45)-C(40)-P(4)    | 114.3(3) |
| C(33)-C(34)-H(34A)  | 109.5    | C(41)-C(40)-H(40)   | 106.7    |
| C(35)-C(34)-H(34A)  | 109.5    | C(45)-C(40)-H(40)   | 106.7    |
| C(33)-C(34)-H(34B)  | 109.5    | P(4)-C(40)-H(40)    | 106.7    |
| C(35)-C(34)-H(34B)  | 109.5    | C(40)-C(41)-C(42)   | 111.1(4) |
| H(34A)-C(34)-H(34B) | 108.1    | C(40)-C(41)-H(41A)  | 109.4    |
| C(36)-C(35)-C(34)   | 111.3(4) | C(42)-C(41)-H(41A)  | 109.4    |
| C(36)-C(35)-H(35A)  | 109.4    | C(40)-C(41)-H(41B)  | 109.4    |
| C(34)-C(35)-H(35A)  | 109.4    | C(42)-C(41)-H(41B)  | 109.4    |
| C(36)-C(35)-H(35B)  | 109.4    | H(41A)-C(41)-H(41B) | 108.0    |
| C(34)-C(35)-H(35B)  | 109.4    | C(43)-C(42)-C(41)   | 110.9(3) |
| H(35A)-C(35)-H(35B) | 108.0    | C(43)-C(42)-H(42A)  | 109.5    |
| C(37)-C(36)-C(35)   | 110.3(5) | C(41)-C(42)-H(42A)  | 109.5    |
| C(37)-C(36)-H(36A)  | 109.6    | C(43)-C(42)-H(42B)  | 109.5    |
| C(35)-C(36)-H(36A)  | 109.6    | C(41)-C(42)-H(42B)  | 109.5    |
| C(37)-C(36)-H(36B)  | 109.6    | H(42A)-C(42)-H(42B) | 108.0    |
| C(35)-C(36)-H(36B)  | 109.6    | C(42)-C(43)-C(44)   | 111.1(4) |
| H(36A)-C(36)-H(36B) | 108.1    | C(42)-C(43)-H(43A)  | 109.4    |
| C(36)-C(37)-C(38)   | 111.0(4) | C(44)-C(43)-H(43A)  | 109.4    |
| C(36)-C(37)-H(37A)  | 109.4    | C(42)-C(43)-H(43B)  | 109.4    |
| C(38)-C(37)-H(37A)  | 109.4    | C(44)-C(43)-H(43B)  | 109.4    |
| C(36)-C(37)-H(37B)  | 109.4    | H(43A)-C(43)-H(43B) | 108.0    |
| C(38)-C(37)-H(37B)  | 109.4    | C(45)-C(44)-C(43)   | 111.0(3) |

|                     |          |                     |          |
|---------------------|----------|---------------------|----------|
| C(45)-C(44)-H(44A)  | 109.4    | C(49)-C(50)-H(50B)  | 109.4    |
| C(43)-C(44)-H(44A)  | 109.4    | C(51)-C(50)-H(50B)  | 109.4    |
| C(45)-C(44)-H(44B)  | 109.4    | H(50A)-C(50)-H(50B) | 108.0    |
| C(43)-C(44)-H(44B)  | 109.4    | C(50)-C(51)-C(46)   | 110.7(3) |
| H(44A)-C(44)-H(44B) | 108.0    | C(50)-C(51)-H(51A)  | 109.5    |
| C(44)-C(45)-C(40)   | 110.9(3) | C(46)-C(51)-H(51A)  | 109.5    |
| C(44)-C(45)-H(45A)  | 109.5    | C(50)-C(51)-H(51B)  | 109.5    |
| C(40)-C(45)-H(45A)  | 109.5    | C(46)-C(51)-H(51B)  | 109.5    |
| C(44)-C(45)-H(45B)  | 109.5    | H(51A)-C(51)-H(51B) | 108.1    |
| C(40)-C(45)-H(45B)  | 109.5    | C(57)-C(52)-C(53)   | 110.0(3) |
| H(45A)-C(45)-H(45B) | 108.0    | C(57)-C(52)-P(5)    | 110.4(3) |
| C(47)-C(46)-C(51)   | 110.0(3) | C(53)-C(52)-P(5)    | 109.3(3) |
| C(47)-C(46)-P(4)    | 110.4(3) | C(57)-C(52)-H(52)   | 109.0    |
| C(51)-C(46)-P(4)    | 110.7(3) | C(53)-C(52)-H(52)   | 109.0    |
| C(47)-C(46)-H(46)   | 108.6    | P(5)-C(52)-H(52)    | 109.0    |
| C(51)-C(46)-H(46)   | 108.6    | C(54)-C(53)-C(52)   | 111.8(4) |
| P(4)-C(46)-H(46)    | 108.6    | C(54)-C(53)-H(53A)  | 109.3    |
| C(48)-C(47)-C(46)   | 111.8(4) | C(52)-C(53)-H(53A)  | 109.3    |
| C(48)-C(47)-H(47A)  | 109.3    | C(54)-C(53)-H(53B)  | 109.3    |
| C(46)-C(47)-H(47A)  | 109.3    | C(52)-C(53)-H(53B)  | 109.3    |
| C(48)-C(47)-H(47B)  | 109.3    | H(53A)-C(53)-H(53B) | 107.9    |
| C(46)-C(47)-H(47B)  | 109.3    | C(55)-C(54)-C(53)   | 111.1(4) |
| H(47A)-C(47)-H(47B) | 107.9    | C(55)-C(54)-H(54A)  | 109.4    |
| C(47)-C(48)-C(49)   | 111.4(4) | C(53)-C(54)-H(54A)  | 109.4    |
| C(47)-C(48)-H(48A)  | 109.3    | C(55)-C(54)-H(54B)  | 109.4    |
| C(49)-C(48)-H(48A)  | 109.3    | C(53)-C(54)-H(54B)  | 109.4    |
| C(47)-C(48)-H(48B)  | 109.3    | H(54A)-C(54)-H(54B) | 108.0    |
| C(49)-C(48)-H(48B)  | 109.3    | C(54)-C(55)-C(56)   | 110.2(4) |
| H(48A)-C(48)-H(48B) | 108.0    | C(54)-C(55)-H(55A)  | 109.6    |
| C(50)-C(49)-C(48)   | 110.5(4) | C(56)-C(55)-H(55A)  | 109.6    |
| C(50)-C(49)-H(49A)  | 109.6    | C(54)-C(55)-H(55B)  | 109.6    |
| C(48)-C(49)-H(49A)  | 109.6    | C(56)-C(55)-H(55B)  | 109.6    |
| C(50)-C(49)-H(49B)  | 109.6    | H(55A)-C(55)-H(55B) | 108.1    |
| C(48)-C(49)-H(49B)  | 109.6    | C(55)-C(56)-C(57)   | 111.7(4) |
| H(49A)-C(49)-H(49B) | 108.1    | C(55)-C(56)-H(56A)  | 109.3    |
| C(49)-C(50)-C(51)   | 111.1(4) | C(57)-C(56)-H(56A)  | 109.3    |
| C(49)-C(50)-H(50A)  | 109.4    | C(55)-C(56)-H(56B)  | 109.3    |
| C(51)-C(50)-H(50A)  | 109.4    | C(57)-C(56)-H(56B)  | 109.3    |

|                     |          |                     |          |
|---------------------|----------|---------------------|----------|
| H(56A)-C(56)-H(56B) | 107.9    | C(62)-C(63)-H(63A)  | 109.6    |
| C(52)-C(57)-C(56)   | 111.8(4) | C(58)-C(63)-H(63A)  | 109.6    |
| C(52)-C(57)-H(57A)  | 109.2    | C(62)-C(63)-H(63B)  | 109.6    |
| C(56)-C(57)-H(57A)  | 109.2    | C(58)-C(63)-H(63B)  | 109.6    |
| C(52)-C(57)-H(57B)  | 109.2    | H(63A)-C(63)-H(63B) | 108.1    |
| C(56)-C(57)-H(57B)  | 109.2    | P(6)-C(64)-P(5)     | 113.6(2) |
| H(57A)-C(57)-H(57B) | 107.9    | P(6)-C(64)-H(64A)   | 108.9    |
| C(59)-C(58)-C(63)   | 111.1(3) | P(5)-C(64)-H(64A)   | 108.9    |
| C(59)-C(58)-P(5)    | 113.0(3) | P(6)-C(64)-H(64B)   | 108.9    |
| C(63)-C(58)-P(5)    | 116.1(3) | P(5)-C(64)-H(64B)   | 108.9    |
| C(59)-C(58)-H(58)   | 105.2    | H(64A)-C(64)-H(64B) | 107.7    |
| C(63)-C(58)-H(58)   | 105.2    | C(70)-C(65)-C(66)   | 110.8(3) |
| P(5)-C(58)-H(58)    | 105.2    | C(70)-C(65)-P(6)    | 110.7(3) |
| C(60)-C(59)-C(58)   | 110.8(4) | C(66)-C(65)-P(6)    | 108.7(3) |
| C(60)-C(59)-H(59A)  | 109.5    | C(70)-C(65)-H(65)   | 108.9    |
| C(58)-C(59)-H(59A)  | 109.5    | C(66)-C(65)-H(65)   | 108.9    |
| C(60)-C(59)-H(59B)  | 109.5    | P(6)-C(65)-H(65)    | 108.9    |
| C(58)-C(59)-H(59B)  | 109.5    | C(67)-C(66)-C(65)   | 112.0(4) |
| H(59A)-C(59)-H(59B) | 108.1    | C(67)-C(66)-H(66A)  | 109.2    |
| C(59)-C(60)-C(61)   | 111.3(4) | C(65)-C(66)-H(66A)  | 109.2    |
| C(59)-C(60)-H(60A)  | 109.4    | C(67)-C(66)-H(66B)  | 109.2    |
| C(61)-C(60)-H(60A)  | 109.4    | C(65)-C(66)-H(66B)  | 109.2    |
| C(59)-C(60)-H(60B)  | 109.4    | H(66A)-C(66)-H(66B) | 107.9    |
| C(61)-C(60)-H(60B)  | 109.4    | C(66)-C(67)-C(68)   | 111.1(4) |
| H(60A)-C(60)-H(60B) | 108.0    | C(66)-C(67)-H(67A)  | 109.4    |
| C(60)-C(61)-C(62)   | 112.5(4) | C(68)-C(67)-H(67A)  | 109.4    |
| C(60)-C(61)-H(61A)  | 109.1    | C(66)-C(67)-H(67B)  | 109.4    |
| C(62)-C(61)-H(61A)  | 109.1    | C(68)-C(67)-H(67B)  | 109.4    |
| C(60)-C(61)-H(61B)  | 109.1    | H(67A)-C(67)-H(67B) | 108.0    |
| C(62)-C(61)-H(61B)  | 109.1    | C(69)-C(68)-C(67)   | 110.7(4) |
| H(61A)-C(61)-H(61B) | 107.8    | C(69)-C(68)-H(68A)  | 109.5    |
| C(63)-C(62)-C(61)   | 111.5(4) | C(67)-C(68)-H(68A)  | 109.5    |
| C(63)-C(62)-H(62A)  | 109.3    | C(69)-C(68)-H(68B)  | 109.5    |
| C(61)-C(62)-H(62A)  | 109.3    | C(67)-C(68)-H(68B)  | 109.5    |
| C(63)-C(62)-H(62B)  | 109.3    | H(68A)-C(68)-H(68B) | 108.1    |
| C(61)-C(62)-H(62B)  | 109.3    | C(68)-C(69)-C(70)   | 111.5(4) |
| H(62A)-C(62)-H(62B) | 108.0    | C(68)-C(69)-H(69A)  | 109.3    |
| C(62)-C(63)-C(58)   | 110.2(4) | C(70)-C(69)-H(69A)  | 109.3    |

|                     |          |                     |            |
|---------------------|----------|---------------------|------------|
| C(68)-C(69)-H(69B)  | 109.3    | H(75A)-C(75)-H(75B) | 107.9      |
| C(70)-C(69)-H(69B)  | 109.3    | C(75)-C(76)-C(71)   | 110.2(4)   |
| H(69A)-C(69)-H(69B) | 108.0    | C(75)-C(76)-H(76A)  | 109.6      |
| C(69)-C(70)-C(65)   | 111.5(4) | C(71)-C(76)-H(76A)  | 109.6      |
| C(69)-C(70)-H(70A)  | 109.3    | C(75)-C(76)-H(76B)  | 109.6      |
| C(65)-C(70)-H(70A)  | 109.3    | C(71)-C(76)-H(76B)  | 109.6      |
| C(69)-C(70)-H(70B)  | 109.3    | H(76A)-C(76)-H(76B) | 108.1      |
| C(65)-C(70)-H(70B)  | 109.3    | O(5)-N(1)-O(4)      | 121.0(3)   |
| H(70A)-C(70)-H(70B) | 108.0    | O(5)-N(1)-O(3)      | 121.1(3)   |
| C(72)-C(71)-C(76)   | 111.9(3) | O(4)-N(1)-O(3)      | 117.8(3)   |
| C(72)-C(71)-P(6)    | 114.7(3) | O(8)-N(2)-O(6)      | 119.3(5)   |
| C(76)-C(71)-P(6)    | 112.2(3) | O(8)-N(2)-O(7)      | 126.4(5)   |
| C(72)-C(71)-H(71)   | 105.7    | O(6)-N(2)-O(7)      | 114.2(5)   |
| C(76)-C(71)-H(71)   | 105.7    | O(10)-N(3)-O(11)    | 124.7(5)   |
| P(6)-C(71)-H(71)    | 105.7    | O(10)-N(3)-O(9)     | 118.0(4)   |
| C(73)-C(72)-C(71)   | 111.2(4) | O(11)-N(3)-O(9)     | 117.3(4)   |
| C(73)-C(72)-H(72A)  | 109.4    | O(14)-N(4)-O(13)    | 123.5(5)   |
| C(71)-C(72)-H(72A)  | 109.4    | O(14)-N(4)-O(12)    | 117.6(4)   |
| C(73)-C(72)-H(72B)  | 109.4    | O(13)-N(4)-O(12)    | 118.8(4)   |
| C(71)-C(72)-H(72B)  | 109.4    | O(16)-N(5)-O(17)    | 123.5(6)   |
| H(72A)-C(72)-H(72B) | 108.0    | O(16)-N(5)-O(15)    | 120.0(5)   |
| C(74)-C(73)-C(72)   | 110.7(4) | O(17)-N(5)-O(15)    | 116.5(4)   |
| C(74)-C(73)-H(73A)  | 109.5    | C(26)-O(1)-Ag(1)    | 120.2(3)   |
| C(72)-C(73)-H(73A)  | 109.5    | C(26)-O(1)-Ag(1)#1  | 135.8(3)   |
| C(74)-C(73)-H(73B)  | 109.5    | Ag(1)-O(1)-Ag(1)#1  | 102.89(13) |
| C(72)-C(73)-H(73B)  | 109.5    | C(26)-O(2)-Ag(2)    | 129.0(4)   |
| H(73A)-C(73)-H(73B) | 108.1    | N(1)-O(3)-Ag(2)     | 98.1(2)    |
| C(75)-C(74)-C(73)   | 110.9(5) | N(1)-O(4)-Ag(2)     | 92.6(2)    |
| C(75)-C(74)-H(74A)  | 109.5    | N(2)-O(6)-Ag(3)     | 118.5(3)   |
| C(73)-C(74)-H(74A)  | 109.5    | N(2)-O(6)-Ag(6)     | 106.8(3)   |
| C(75)-C(74)-H(74B)  | 109.5    | Ag(3)-O(6)-Ag(6)    | 127.42(15) |
| C(73)-C(74)-H(74B)  | 109.5    | N(3)-O(9)-Ag(5)     | 113.5(3)   |
| H(74A)-C(74)-H(74B) | 108.0    | N(3)-O(9)-Ag(3)     | 108.0(2)   |
| C(74)-C(75)-C(76)   | 112.2(5) | Ag(5)-O(9)-Ag(3)    | 138.21(15) |
| C(74)-C(75)-H(75A)  | 109.2    | N(4)-O(12)-Ag(6)    | 109.1(3)   |
| C(76)-C(75)-H(75A)  | 109.2    | N(4)-O(12)-Ag(4)    | 109.5(3)   |
| C(74)-C(75)-H(75B)  | 109.2    | Ag(6)-O(12)-Ag(4)   | 141.16(16) |
| C(76)-C(75)-H(75B)  | 109.2    | N(5)-O(15)-Ag(4)    | 103.8(3)   |

|                   |            |                    |            |
|-------------------|------------|--------------------|------------|
| N(5)-O(15)-Ag(5)  | 124.3(3)   | O(1)-Ag(1)-P(1)    | 162.80(9)  |
| Ag(4)-O(15)-Ag(5) | 118.71(19) | O(1)-Ag(1)-O(1)#1  | 77.11(13)  |
| C(1)-P(1)-C(13)   | 106.20(17) | P(1)-Ag(1)-O(1)#1  | 120.07(8)  |
| C(1)-P(1)-C(7)    | 107.33(19) | O(1)-Ag(1)-Ag(2)   | 80.17(9)   |
| C(13)-P(1)-C(7)   | 104.4(2)   | P(1)-Ag(1)-Ag(2)   | 85.72(2)   |
| C(1)-P(1)-Ag(1)   | 109.89(12) | O(1)#1-Ag(1)-Ag(2) | 135.74(8)  |
| C(13)-P(1)-Ag(1)  | 110.75(13) | O(2)-Ag(2)-P(2)    | 139.22(10) |
| C(7)-P(1)-Ag(1)   | 117.59(15) | O(2)-Ag(2)-O(3)    | 84.15(14)  |
| C(13)-P(2)-C(20)  | 102.84(18) | P(2)-Ag(2)-O(3)    | 133.31(10) |
| C(13)-P(2)-C(14)  | 104.15(18) | O(2)-Ag(2)-O(4)    | 82.01(14)  |
| C(20)-P(2)-C(14)  | 106.32(18) | P(2)-Ag(2)-O(4)    | 131.15(8)  |
| C(13)-P(2)-Ag(2)  | 109.65(13) | O(3)-Ag(2)-O(4)    | 51.39(10)  |
| C(20)-P(2)-Ag(2)  | 118.11(15) | O(2)-Ag(2)-Ag(1)   | 70.36(10)  |
| C(14)-P(2)-Ag(2)  | 114.32(14) | P(2)-Ag(2)-Ag(1)   | 73.22(2)   |
| C(33)-P(3)-C(39)  | 103.47(18) | O(3)-Ag(2)-Ag(1)   | 153.45(9)  |
| C(33)-P(3)-C(27)  | 107.51(19) | O(4)-Ag(2)-Ag(1)   | 115.42(7)  |
| C(39)-P(3)-C(27)  | 103.03(19) | O(6)-Ag(3)-P(3)    | 160.55(10) |
| C(33)-P(3)-Ag(3)  | 111.22(13) | O(6)-Ag(3)-O(9)    | 75.35(12)  |
| C(39)-P(3)-Ag(3)  | 116.33(12) | P(3)-Ag(3)-O(9)    | 122.90(9)  |
| C(27)-P(3)-Ag(3)  | 114.29(14) | O(6)-Ag(3)-Ag(4)   | 94.03(10)  |
| C(46)-P(4)-C(40)  | 105.95(17) | P(3)-Ag(3)-Ag(4)   | 84.17(2)   |
| C(46)-P(4)-C(39)  | 103.31(17) | O(9)-Ag(3)-Ag(4)   | 78.61(8)   |
| C(40)-P(4)-C(39)  | 103.48(17) | O(15)-Ag(4)-P(4)   | 145.28(11) |
| C(46)-P(4)-Ag(4)  | 110.47(12) | O(15)-Ag(4)-O(12)  | 82.26(15)  |
| C(40)-P(4)-Ag(4)  | 113.37(12) | P(4)-Ag(4)-O(12)   | 128.77(12) |
| C(39)-P(4)-Ag(4)  | 119.04(12) | O(15)-Ag(4)-Ag(3)  | 89.64(10)  |
| C(64)-P(5)-C(52)  | 103.71(17) | P(4)-Ag(4)-Ag(3)   | 82.81(2)   |
| C(64)-P(5)-C(58)  | 103.34(18) | O(12)-Ag(4)-Ag(3)  | 79.24(9)   |
| C(52)-P(5)-C(58)  | 109.86(18) | O(9)-Ag(5)-P(5)    | 154.96(10) |
| C(64)-P(5)-Ag(5)  | 113.59(12) | O(9)-Ag(5)-O(15)   | 77.29(13)  |
| C(52)-P(5)-Ag(5)  | 112.72(13) | P(5)-Ag(5)-O(15)   | 127.28(10) |
| C(58)-P(5)-Ag(5)  | 112.88(14) | O(9)-Ag(5)-Ag(6)   | 75.48(9)   |
| C(64)-P(6)-C(71)  | 103.34(18) | P(5)-Ag(5)-Ag(6)   | 91.74(2)   |
| C(64)-P(6)-C(65)  | 103.19(17) | O(15)-Ag(5)-Ag(6)  | 104.16(11) |
| C(71)-P(6)-C(65)  | 109.15(17) | O(12)-Ag(6)-P(6)   | 134.50(12) |
| C(64)-P(6)-Ag(6)  | 115.36(13) | O(12)-Ag(6)-O(6)   | 81.02(13)  |
| C(71)-P(6)-Ag(6)  | 111.49(13) | P(6)-Ag(6)-O(6)    | 137.65(10) |
| C(65)-P(6)-Ag(6)  | 113.51(12) | O(12)-Ag(6)-Ag(5)  | 71.71(11)  |

P(6)-Ag(6)-Ag(5)

80.15(2)

O(6)-Ag(6)-Ag(5)

95.24(8)

---

Symmetry transformations used to generate equivalent atoms:

#1 -x,-y-1,-z+1

**Table S6.** Anisotropic displacement parameters ( $\text{\AA}^2 \times 10^3$ ) for **3**. The anisotropic displacement factor exponent takes the form:  $-2\pi^2 [ h^2 a^{*2} U^{11} + \dots + 2 h k a^* b^* U^{12} ]$

|       | $U^{11}$ | $U^{22}$ | $U^{33}$ | $U^{23}$ | $U^{13}$ | $U^{12}$ |
|-------|----------|----------|----------|----------|----------|----------|
| C(1)  | 24(2)    | 24(2)    | 26(2)    | 0(1)     | 2(1)     | 0(1)     |
| C(2)  | 37(2)    | 28(2)    | 25(2)    | -4(2)    | 0(2)     | 4(2)     |
| C(3)  | 42(2)    | 27(2)    | 36(2)    | -6(2)    | 2(2)     | 7(2)     |
| C(4)  | 50(3)    | 25(2)    | 37(2)    | 1(2)     | -3(2)    | 5(2)     |
| C(5)  | 50(3)    | 32(2)    | 34(2)    | -1(2)    | -11(2)   | 4(2)     |
| C(6)  | 40(2)    | 30(2)    | 26(2)    | -4(2)    | -3(2)    | 4(2)     |
| C(7)  | 42(2)    | 26(2)    | 39(2)    | -5(2)    | 7(2)     | -2(2)    |
| C(8)  | 40(2)    | 31(2)    | 45(2)    | 0(2)     | -4(2)    | -9(2)    |
| C(9)  | 69(4)    | 39(3)    | 76(4)    | -6(3)    | -19(3)   | -15(3)   |
| C(10) | 63(4)    | 42(3)    | 81(4)    | -3(3)    | -23(3)   | -6(3)    |
| C(11) | 82(4)    | 40(3)    | 70(4)    | -9(3)    | -6(3)    | 14(3)    |
| C(12) | 47(3)    | 46(3)    | 62(3)    | -3(2)    | 3(2)     | 10(2)    |
| C(13) | 23(2)    | 32(2)    | 32(2)    | 7(2)     | 5(1)     | 1(1)     |
| C(14) | 27(2)    | 35(2)    | 24(2)    | 3(2)     | 1(1)     | 5(2)     |
| C(15) | 26(2)    | 43(2)    | 33(2)    | 2(2)     | 2(2)     | 2(2)     |
| C(16) | 32(2)    | 64(3)    | 39(2)    | -3(2)    | 6(2)     | 8(2)     |
| C(17) | 46(3)    | 55(3)    | 43(2)    | -6(2)    | 5(2)     | 23(2)    |
| C(18) | 52(3)    | 38(2)    | 46(3)    | -3(2)    | 3(2)     | 14(2)    |
| C(19) | 39(2)    | 32(2)    | 43(2)    | 9(2)     | 8(2)     | 6(2)     |
| C(20) | 32(2)    | 34(2)    | 31(2)    | 3(2)     | 7(2)     | 0(2)     |
| C(21) | 43(2)    | 40(2)    | 41(2)    | -1(2)    | 15(2)    | 4(2)     |
| C(22) | 58(3)    | 52(3)    | 44(3)    | 0(2)     | 24(2)    | -1(2)    |
| C(23) | 75(4)    | 78(4)    | 30(2)    | -6(2)    | 16(2)    | -23(3)   |
| C(24) | 47(3)    | 104(5)   | 34(2)    | 10(3)    | 0(2)     | -12(3)   |
| C(25) | 38(2)    | 78(4)    | 31(2)    | 2(2)     | 2(2)     | -8(2)    |
| C(26) | 66(3)    | 55(3)    | 60(3)    | -19(3)   | 30(3)    | -28(3)   |
| C(27) | 31(2)    | 37(2)    | 36(2)    | 4(2)     | 12(2)    | 0(2)     |
| C(28) | 38(2)    | 57(3)    | 31(2)    | 3(2)     | 6(2)     | 12(2)    |
| C(29) | 45(3)    | 90(5)    | 41(3)    | -1(3)    | 15(2)    | 17(3)    |
| C(30) | 65(4)    | 74(4)    | 40(3)    | -4(3)    | 16(2)    | 13(3)    |
| C(31) | 61(3)    | 71(4)    | 32(2)    | 5(2)     | 8(2)     | 11(3)    |
| C(32) | 42(2)    | 49(3)    | 32(2)    | 4(2)     | 4(2)     | 7(2)     |

|       |       |       |       |        |        |        |
|-------|-------|-------|-------|--------|--------|--------|
| C(33) | 25(2) | 25(2) | 40(2) | 1(2)   | 5(2)   | -2(1)  |
| C(34) | 34(2) | 39(2) | 56(3) | 5(2)   | -2(2)  | -15(2) |
| C(35) | 42(3) | 57(3) | 70(4) | 8(3)   | -15(2) | -23(2) |
| C(36) | 64(3) | 45(3) | 69(4) | -14(3) | -20(3) | -17(3) |
| C(37) | 41(2) | 48(3) | 48(3) | -10(2) | -4(2)  | -2(2)  |
| C(38) | 35(2) | 33(2) | 41(2) | -8(2)  | 4(2)   | -7(2)  |
| C(39) | 26(2) | 24(2) | 29(2) | -2(1)  | 5(1)   | 1(1)   |
| C(40) | 24(2) | 27(2) | 29(2) | 2(1)   | 7(1)   | 0(1)   |
| C(41) | 34(2) | 31(2) | 27(2) | -2(2)  | 1(2)   | 3(2)   |
| C(42) | 40(2) | 46(3) | 30(2) | 9(2)   | 3(2)   | 4(2)   |
| C(43) | 43(2) | 32(2) | 42(2) | 10(2)  | -2(2)  | 6(2)   |
| C(44) | 39(2) | 24(2) | 51(3) | 9(2)   | -3(2)  | -2(2)  |
| C(45) | 33(2) | 20(2) | 32(2) | -1(1)  | -1(2)  | 0(1)   |
| C(46) | 26(2) | 25(2) | 27(2) | -2(1)  | 5(1)   | 0(1)   |
| C(47) | 32(2) | 35(2) | 34(2) | 7(2)   | 5(2)   | -5(2)  |
| C(48) | 43(2) | 61(3) | 34(2) | 8(2)   | -1(2)  | -13(2) |
| C(49) | 34(2) | 59(3) | 45(3) | 8(2)   | -7(2)  | -13(2) |
| C(50) | 31(2) | 40(2) | 51(3) | 1(2)   | -3(2)  | -11(2) |
| C(51) | 29(2) | 28(2) | 36(2) | 4(2)   | 1(2)   | -7(2)  |
| C(52) | 29(2) | 27(2) | 26(2) | 2(1)   | -2(1)  | 2(1)   |
| C(53) | 38(2) | 28(2) | 33(2) | 0(2)   | -9(2)  | -2(2)  |
| C(54) | 50(3) | 30(2) | 47(3) | 10(2)  | -8(2)  | -9(2)  |
| C(55) | 66(3) | 34(2) | 42(2) | 16(2)  | -8(2)  | -12(2) |
| C(56) | 69(3) | 43(3) | 29(2) | 11(2)  | -4(2)  | -13(2) |
| C(57) | 40(2) | 31(2) | 23(2) | 3(2)   | -3(2)  | -6(2)  |
| C(58) | 35(2) | 29(2) | 24(2) | 3(1)   | 0(2)   | -3(2)  |
| C(59) | 32(2) | 44(2) | 32(2) | -5(2)  | 3(2)   | -6(2)  |
| C(60) | 56(3) | 58(3) | 34(2) | 2(2)   | 3(2)   | -29(3) |
| C(61) | 72(3) | 32(2) | 38(2) | -1(2)  | -9(2)  | -12(2) |
| C(62) | 72(4) | 30(2) | 48(3) | -3(2)  | -18(2) | 6(2)   |
| C(63) | 38(2) | 28(2) | 38(2) | -6(2)  | -4(2)  | 6(2)   |
| C(64) | 29(2) | 34(2) | 21(2) | 1(1)   | 2(1)   | 3(2)   |
| C(65) | 24(2) | 21(2) | 26(2) | -4(1)  | 0(1)   | 1(1)   |
| C(66) | 27(2) | 34(2) | 30(2) | -3(2)  | 1(1)   | -5(2)  |
| C(67) | 26(2) | 41(2) | 53(3) | -13(2) | 1(2)   | -3(2)  |
| C(68) | 32(2) | 36(2) | 45(2) | -5(2)  | -14(2) | 1(2)   |
| C(69) | 47(2) | 37(2) | 35(2) | 3(2)   | -14(2) | 0(2)   |
| C(70) | 35(2) | 33(2) | 29(2) | 2(2)   | -3(2)  | -2(2)  |



|       |        |       |        |        |        |        |
|-------|--------|-------|--------|--------|--------|--------|
| C(71) | 29(2)  | 27(2) | 24(2)  | 2(1)   | 2(1)   | -4(1)  |
| C(72) | 37(2)  | 25(2) | 37(2)  | 3(2)   | -2(2)  | -5(2)  |
| C(73) | 67(3)  | 34(2) | 54(3)  | -1(2)  | 2(2)   | -22(2) |
| C(74) | 79(4)  | 49(3) | 60(3)  | 11(3)  | 14(3)  | -34(3) |
| C(75) | 52(3)  | 72(4) | 50(3)  | 2(3)   | 20(2)  | -29(3) |
| C(76) | 36(2)  | 45(2) | 32(2)  | 0(2)   | 11(2)  | -9(2)  |
| N(1)  | 29(2)  | 30(2) | 29(2)  | -5(1)  | 2(1)   | 3(1)   |
| N(2)  | 71(3)  | 38(2) | 40(2)  | 1(2)   | -7(2)  | 14(2)  |
| N(3)  | 47(2)  | 29(2) | 46(2)  | 1(2)   | 10(2)  | 0(2)   |
| N(4)  | 37(2)  | 34(2) | 58(2)  | 7(2)   | 14(2)  | -2(2)  |
| N(5)  | 57(2)  | 40(2) | 42(2)  | -14(2) | -14(2) | 20(2)  |
| O(1)  | 37(2)  | 44(2) | 49(2)  | -11(1) | 17(1)  | -12(1) |
| O(2)  | 92(3)  | 45(2) | 65(2)  | -17(2) | 43(2)  | -23(2) |
| O(3)  | 39(2)  | 43(2) | 49(2)  | -13(2) | -13(1) | 15(1)  |
| O(4)  | 33(2)  | 41(2) | 40(2)  | -11(1) | -7(1)  | 2(1)   |
| O(5)  | 43(2)  | 35(2) | 44(2)  | -13(1) | -6(1)  | 9(1)   |
| O(6)  | 45(2)  | 54(2) | 37(2)  | -6(1)  | 2(1)   | 21(2)  |
| O(7)  | 75(3)  | 85(4) | 117(4) | -23(3) | -30(3) | 21(3)  |
| O(8)  | 122(4) | 59(3) | 41(2)  | 0(2)   | 17(2)  | 21(3)  |
| O(9)  | 45(2)  | 33(2) | 51(2)  | -7(1)  | 21(2)  | 0(1)   |
| O(10) | 81(3)  | 58(3) | 123(4) | -46(3) | 30(3)  | -22(2) |
| O(11) | 70(3)  | 46(2) | 66(2)  | 11(2)  | 33(2)  | -5(2)  |
| O(12) | 30(2)  | 32(2) | 105(3) | 16(2)  | 15(2)  | 2(1)   |
| O(13) | 38(2)  | 69(3) | 123(4) | 16(3)  | -8(2)  | -3(2)  |
| O(14) | 66(3)  | 42(2) | 84(3)  | 19(2)  | 35(2)  | 0(2)   |
| O(15) | 83(3)  | 30(2) | 56(2)  | -4(2)  | 26(2)  | 13(2)  |
| O(16) | 103(4) | 79(3) | 81(3)  | -43(3) | -38(3) | 43(3)  |
| O(17) | 160(6) | 39(2) | 48(2)  | 3(2)   | 12(3)  | 8(3)   |
| P(1)  | 21(1)  | 23(1) | 27(1)  | 1(1)   | 2(1)   | 1(1)   |
| P(2)  | 23(1)  | 28(1) | 25(1)  | 2(1)   | 2(1)   | 1(1)   |
| P(3)  | 24(1)  | 22(1) | 31(1)  | 1(1)   | 5(1)   | -2(1)  |
| P(4)  | 23(1)  | 19(1) | 25(1)  | -2(1)  | 5(1)   | 1(1)   |
| P(5)  | 24(1)  | 24(1) | 20(1)  | 0(1)   | 0(1)   | 3(1)   |
| P(6)  | 23(1)  | 20(1) | 21(1)  | 0(1)   | 2(1)   | 1(1)   |
| Ag(1) | 24(1)  | 41(1) | 35(1)  | 8(1)   | 7(1)   | -1(1)  |
| Ag(2) | 33(1)  | 26(1) | 43(1)  | -4(1)  | 3(1)   | -1(1)  |
| Ag(3) | 34(1)  | 26(1) | 40(1)  | 2(1)   | 7(1)   | 6(1)   |
| Ag(4) | 35(1)  | 26(1) | 42(1)  | -5(1)  | 11(1)  | 6(1)   |

|       |       |       |       |       |      |       |
|-------|-------|-------|-------|-------|------|-------|
| Ag(5) | 30(1) | 40(1) | 35(1) | -8(1) | 2(1) | 11(1) |
| Ag(6) | 43(1) | 29(1) | 44(1) | -5(1) | 3(1) | 12(1) |

---

**Table S7.** Hydrogen coordinates ( $\times 10^4$ ) and isotropic displacement parameters ( $\text{\AA}^2 \times 10^3$ ) for **3**.

|        | x     | y     | z    | U(eq) |
|--------|-------|-------|------|-------|
| H(1)   | 2373  | -5048 | 4485 | 30    |
| H(2A)  | 1511  | -6227 | 4334 | 36    |
| H(2B)  | 1857  | -5909 | 3846 | 36    |
| H(3A)  | 2623  | -6595 | 4250 | 42    |
| H(3B)  | 2146  | -7240 | 4160 | 42    |
| H(4A)  | 2608  | -7400 | 5077 | 46    |
| H(4B)  | 1994  | -7169 | 5129 | 46    |
| H(5A)  | 2870  | -6020 | 5259 | 48    |
| H(5B)  | 2542  | -6337 | 5763 | 48    |
| H(6A)  | 2234  | -5000 | 5463 | 39    |
| H(6B)  | 1757  | -5647 | 5379 | 39    |
| H(7)   | 1760  | -3656 | 5285 | 43    |
| H(8A)  | 2573  | -3689 | 4847 | 47    |
| H(8B)  | 2318  | -3148 | 4335 | 47    |
| H(9A)  | 2528  | -2578 | 5478 | 75    |
| H(9B)  | 2842  | -2282 | 4959 | 75    |
| H(10A) | 2075  | -1613 | 4559 | 77    |
| H(10B) | 2209  | -1289 | 5189 | 77    |
| H(11A) | 1532  | -2176 | 5524 | 78    |
| H(11B) | 1258  | -1610 | 5033 | 78    |
| H(12A) | 991   | -3003 | 4871 | 62    |
| H(12B) | 1317  | -2687 | 4366 | 62    |
| H(13A) | 1557  | -3593 | 3692 | 35    |
| H(13B) | 1763  | -4485 | 3546 | 35    |
| H(14)  | 441   | -3688 | 4061 | 35    |
| H(15A) | -380  | -4008 | 3170 | 41    |
| H(15B) | -270  | -4567 | 3717 | 41    |
| H(16A) | -1004 | -3632 | 3819 | 54    |
| H(16B) | -535  | -3497 | 4305 | 54    |
| H(17A) | -809  | -2205 | 3952 | 57    |
| H(17B) | -726  | -2483 | 3323 | 57    |

|        |      |       |      |    |
|--------|------|-------|------|----|
| H(18A) | 128  | -2245 | 4197 | 54 |
| H(18B) | 15   | -1666 | 3660 | 54 |
| H(19A) | 744  | -2583 | 3522 | 45 |
| H(19B) | 262  | -2735 | 3051 | 45 |
| H(20)  | 997  | -3425 | 2634 | 39 |
| H(21A) | 1301 | -5063 | 2339 | 49 |
| H(21B) | 1708 | -4369 | 2577 | 49 |
| H(22A) | 1540 | -3584 | 1741 | 60 |
| H(22B) | 1706 | -4483 | 1562 | 60 |
| H(23A) | 799  | -4822 | 1310 | 72 |
| H(23B) | 944  | -4016 | 976  | 72 |
| H(24A) | 108  | -3836 | 1379 | 74 |
| H(24B) | 534  | -3184 | 1638 | 74 |
| H(25A) | 86   | -3780 | 2387 | 59 |
| H(25B) | 258  | -4674 | 2201 | 59 |
| H(27)  | 1404 | -327  | 4180 | 41 |
| H(28A) | 812  | 622   | 3688 | 50 |
| H(28B) | 1169 | 1366  | 3941 | 50 |
| H(29A) | 427  | 1178  | 4504 | 70 |
| H(29B) | 591  | 245   | 4613 | 70 |
| H(30A) | 1211 | 1630  | 5046 | 71 |
| H(30B) | 896  | 1017  | 5422 | 71 |
| H(31A) | 1489 | -53   | 5255 | 65 |
| H(31B) | 1835 | 712   | 5488 | 65 |
| H(32A) | 2217 | 107   | 4685 | 49 |
| H(32B) | 2062 | 1041  | 4563 | 49 |
| H(33)  | 1205 | 324   | 2774 | 36 |
| H(34A) | 896  | -810  | 3277 | 52 |
| H(34B) | 1368 | -1374 | 3084 | 52 |
| H(35A) | 564  | -1673 | 2508 | 69 |
| H(35B) | 505  | -735  | 2328 | 69 |
| H(36A) | 1355 | -1792 | 2021 | 72 |
| H(36B) | 870  | -1491 | 1593 | 72 |
| H(37A) | 1176 | -121  | 1671 | 55 |
| H(37B) | 1654 | -681  | 1488 | 55 |
| H(38A) | 1960 | 240   | 2233 | 44 |
| H(38B) | 2064 | -689  | 2413 | 44 |
| H(39A) | 2150 | 1510  | 3678 | 31 |

|        |      |       |      |    |
|--------|------|-------|------|----|
| H(39B) | 1838 | 1453  | 3071 | 31 |
| H(40)  | 2983 | 2406  | 2362 | 32 |
| H(41A) | 1897 | 1858  | 2129 | 37 |
| H(41B) | 2390 | 1555  | 1799 | 37 |
| H(42A) | 2496 | 2886  | 1417 | 47 |
| H(42B) | 1889 | 2607  | 1270 | 47 |
| H(43A) | 1603 | 3415  | 2016 | 47 |
| H(43B) | 1926 | 3987  | 1620 | 47 |
| H(44A) | 2702 | 3915  | 2266 | 46 |
| H(44B) | 2213 | 4229  | 2596 | 46 |
| H(45A) | 2098 | 2905  | 2977 | 34 |
| H(45B) | 2704 | 3182  | 3127 | 34 |
| H(46)  | 3058 | 2151  | 3796 | 31 |
| H(47A) | 3085 | 790   | 4153 | 41 |
| H(47B) | 3569 | 567   | 3785 | 41 |
| H(48A) | 3922 | 812   | 4720 | 56 |
| H(48B) | 3639 | 1686  | 4720 | 56 |
| H(49A) | 4558 | 1885  | 4578 | 56 |
| H(49B) | 4513 | 1272  | 4054 | 56 |
| H(50A) | 4478 | 2635  | 3710 | 50 |
| H(50B) | 3987 | 2836  | 4073 | 50 |
| H(51A) | 3934 | 1713  | 3131 | 37 |
| H(51B) | 3652 | 2590  | 3118 | 37 |
| H(52)  | 4596 | -2701 | 1041 | 33 |
| H(53A) | 4135 | -1249 | 1507 | 40 |
| H(53B) | 4736 | -1549 | 1651 | 40 |
| H(54A) | 4706 | -439  | 983  | 52 |
| H(54B) | 4953 | -1238 | 720  | 52 |
| H(55A) | 4315 | -666  | 38   | 57 |
| H(55B) | 3865 | -688  | 475  | 57 |
| H(56A) | 4340 | -2116 | 11   | 57 |
| H(56B) | 3737 | -1825 | -143 | 57 |
| H(57A) | 3511 | -2137 | 781  | 38 |
| H(57B) | 3762 | -2933 | 519  | 38 |
| H(58)  | 3801 | -4352 | 1891 | 36 |
| H(59A) | 2969 | -3767 | 1547 | 43 |
| H(59B) | 3160 | -3773 | 923  | 43 |
| H(60A) | 2633 | -4958 | 1035 | 59 |

|        |          |           |          |        |
|--------|----------|-----------|----------|--------|
| H(60B) | 3000     | -5215     | 1588     | 59     |
| H(61A) | 3329     | -5236     | 457      | 58     |
| H(61B) | 3259     | -6024     | 838      | 58     |
| H(62A) | 4028     | -5680     | 1435     | 61     |
| H(62B) | 4194     | -5666     | 803      | 61     |
| H(63A) | 4149     | -4215     | 779      | 42     |
| H(63B) | 4533     | -4473     | 1319     | 42     |
| H(64A) | 4764     | -3715     | 2175     | 34     |
| H(64B) | 4903     | -2764     | 2174     | 34     |
| H(65)  | 5301     | -3880     | 3251     | 28     |
| H(66A) | 5623     | -2695     | 2813     | 36     |
| H(66B) | 5445     | -2125     | 3308     | 36     |
| H(67A) | 6381     | -2329     | 3452     | 48     |
| H(67B) | 6306     | -3298     | 3425     | 48     |
| H(68A) | 6459     | -2904     | 4387     | 46     |
| H(68B) | 5974     | -2270     | 4319     | 46     |
| H(69A) | 5681     | -3471     | 4760     | 49     |
| H(69B) | 5858     | -4020     | 4253     | 49     |
| H(70A) | 4987     | -2862     | 4162     | 39     |
| H(70B) | 4917     | -3831     | 4129     | 39     |
| H(71)  | 3756     | -3941     | 2796     | 32     |
| H(72A) | 4456     | -4882     | 2700     | 40     |
| H(72B) | 4586     | -4908     | 3367     | 40     |
| H(73A) | 3604     | -5488     | 2782     | 62     |
| H(73B) | 4051     | -6062     | 3094     | 62     |
| H(74A) | 3322     | -5875     | 3672     | 75     |
| H(74B) | 3864     | -5528     | 3983     | 75     |
| H(75A) | 3173     | -4560     | 4065     | 68     |
| H(75B) | 3047     | -4540     | 3398     | 68     |
| H(76A) | 4008     | -3904     | 3995     | 45     |
| H(76B) | 3556     | -3362     | 3661     | 45     |
| H      | -370(30) | -6950(50) | 4590(30) | 90(30) |

---

**Table S8.** Torsion angles [°] for **3**.

|                         |           |                         |           |
|-------------------------|-----------|-------------------------|-----------|
| C(6)-C(1)-C(2)-C(3)     | -54.0(4)  | C(28)-C(29)-C(30)-C(31) | -55.9(7)  |
| P(1)-C(1)-C(2)-C(3)     | -174.6(3) | C(29)-C(30)-C(31)-C(32) | 54.8(7)   |
| C(1)-C(2)-C(3)-C(4)     | 55.7(5)   | C(30)-C(31)-C(32)-C(27) | -55.2(7)  |
| C(2)-C(3)-C(4)-C(5)     | -56.7(5)  | C(28)-C(27)-C(32)-C(31) | 56.5(5)   |
| C(3)-C(4)-C(5)-C(6)     | 57.3(5)   | P(3)-C(27)-C(32)-C(31)  | -175.3(4) |
| C(4)-C(5)-C(6)-C(1)     | -56.8(5)  | C(38)-C(33)-C(34)-C(35) | -53.9(5)  |
| C(2)-C(1)-C(6)-C(5)     | 54.5(4)   | P(3)-C(33)-C(34)-C(35)  | -174.8(4) |
| P(1)-C(1)-C(6)-C(5)     | 175.4(3)  | C(33)-C(34)-C(35)-C(36) | 58.0(6)   |
| C(12)-C(7)-C(8)-C(9)    | 53.6(6)   | C(34)-C(35)-C(36)-C(37) | -59.0(6)  |
| P(1)-C(7)-C(8)-C(9)     | 179.1(4)  | C(35)-C(36)-C(37)-C(38) | 56.7(6)   |
| C(7)-C(8)-C(9)-C(10)    | -55.3(7)  | C(36)-C(37)-C(38)-C(33) | -54.4(6)  |
| C(8)-C(9)-C(10)-C(11)   | 56.8(8)   | C(34)-C(33)-C(38)-C(37) | 53.0(5)   |
| C(9)-C(10)-C(11)-C(12)  | -57.6(7)  | P(3)-C(33)-C(38)-C(37)  | 175.9(3)  |
| C(8)-C(7)-C(12)-C(11)   | -56.4(6)  | C(45)-C(40)-C(41)-C(42) | 55.5(4)   |
| P(1)-C(7)-C(12)-C(11)   | 176.1(4)  | P(4)-C(40)-C(41)-C(42)  | -176.3(3) |
| C(10)-C(11)-C(12)-C(7)  | 58.4(7)   | C(40)-C(41)-C(42)-C(43) | -55.6(5)  |
| C(19)-C(14)-C(15)-C(16) | -55.8(5)  | C(41)-C(42)-C(43)-C(44) | 56.1(5)   |
| P(2)-C(14)-C(15)-C(16)  | 173.5(3)  | C(42)-C(43)-C(44)-C(45) | -56.6(5)  |
| C(14)-C(15)-C(16)-C(17) | 54.6(5)   | C(43)-C(44)-C(45)-C(40) | 56.3(5)   |
| C(15)-C(16)-C(17)-C(18) | -54.9(5)  | C(41)-C(40)-C(45)-C(44) | -55.9(4)  |
| C(16)-C(17)-C(18)-C(19) | 56.3(5)   | P(4)-C(40)-C(45)-C(44)  | 177.8(3)  |
| C(17)-C(18)-C(19)-C(14) | -57.1(5)  | C(51)-C(46)-C(47)-C(48) | 55.5(5)   |
| C(15)-C(14)-C(19)-C(18) | 56.8(5)   | P(4)-C(46)-C(47)-C(48)  | 177.9(3)  |
| P(2)-C(14)-C(19)-C(18)  | -174.3(3) | C(46)-C(47)-C(48)-C(49) | -55.7(6)  |
| C(25)-C(20)-C(21)-C(22) | 54.5(6)   | C(47)-C(48)-C(49)-C(50) | 56.0(6)   |
| P(2)-C(20)-C(21)-C(22)  | 177.8(4)  | C(48)-C(49)-C(50)-C(51) | -57.0(6)  |
| C(20)-C(21)-C(22)-C(23) | -54.9(6)  | C(49)-C(50)-C(51)-C(46) | 57.7(5)   |
| C(21)-C(22)-C(23)-C(24) | 56.5(7)   | C(47)-C(46)-C(51)-C(50) | -56.0(5)  |
| C(22)-C(23)-C(24)-C(25) | -57.9(7)  | P(4)-C(46)-C(51)-C(50)  | -178.3(3) |
| C(21)-C(20)-C(25)-C(24) | -56.3(6)  | C(57)-C(52)-C(53)-C(54) | -54.4(5)  |
| P(2)-C(20)-C(25)-C(24)  | -179.8(4) | P(5)-C(52)-C(53)-C(54)  | -175.7(3) |
| C(23)-C(24)-C(25)-C(20) | 57.9(7)   | C(52)-C(53)-C(54)-C(55) | 56.0(5)   |
| C(32)-C(27)-C(28)-C(29) | -57.6(6)  | C(53)-C(54)-C(55)-C(56) | -56.3(6)  |
| P(3)-C(27)-C(28)-C(29)  | 176.5(4)  | C(54)-C(55)-C(56)-C(57) | 56.7(6)   |
| C(27)-C(28)-C(29)-C(30) | 57.4(7)   | C(53)-C(52)-C(57)-C(56) | 54.5(5)   |

|                         |           |                        |           |
|-------------------------|-----------|------------------------|-----------|
| P(5)-C(52)-C(57)-C(56)  | 175.2(3)  | O(11)-N(3)-O(9)-Ag(5)  | 179.0(4)  |
| C(55)-C(56)-C(57)-C(52) | -56.6(6)  | O(10)-N(3)-O(9)-Ag(3)  | -174.3(5) |
| C(63)-C(58)-C(59)-C(60) | 58.1(5)   | O(11)-N(3)-O(9)-Ag(3)  | 4.5(5)    |
| P(5)-C(58)-C(59)-C(60)  | -169.3(3) | O(14)-N(4)-O(12)-Ag(6) | 180.0(4)  |
| C(58)-C(59)-C(60)-C(61) | -55.4(5)  | O(13)-N(4)-O(12)-Ag(6) | 0.2(6)    |
| C(59)-C(60)-C(61)-C(62) | 53.2(6)   | O(14)-N(4)-O(12)-Ag(4) | -4.5(6)   |
| C(60)-C(61)-C(62)-C(63) | -53.2(6)  | O(13)-N(4)-O(12)-Ag(4) | 175.7(4)  |
| C(61)-C(62)-C(63)-C(58) | 54.8(5)   | O(16)-N(5)-O(15)-Ag(4) | -174.8(4) |
| C(59)-C(58)-C(63)-C(62) | -57.7(5)  | O(17)-N(5)-O(15)-Ag(4) | 7.0(6)    |
| P(5)-C(58)-C(63)-C(62)  | 171.3(3)  | O(16)-N(5)-O(15)-Ag(5) | 45.2(7)   |
| C(70)-C(65)-C(66)-C(67) | 53.7(4)   | O(17)-N(5)-O(15)-Ag(5) | -132.9(5) |
| P(6)-C(65)-C(66)-C(67)  | 175.6(3)  | C(2)-C(1)-P(1)-C(13)   | -63.9(3)  |
| C(65)-C(66)-C(67)-C(68) | -55.2(5)  | C(6)-C(1)-P(1)-C(13)   | 174.8(3)  |
| C(66)-C(67)-C(68)-C(69) | 56.3(5)   | C(2)-C(1)-P(1)-C(7)    | -175.0(3) |
| C(67)-C(68)-C(69)-C(70) | -56.9(5)  | C(6)-C(1)-P(1)-C(7)    | 63.6(3)   |
| C(68)-C(69)-C(70)-C(65) | 56.0(5)   | C(2)-C(1)-P(1)-Ag(1)   | 56.0(3)   |
| C(66)-C(65)-C(70)-C(69) | -53.8(4)  | C(6)-C(1)-P(1)-Ag(1)   | -65.3(3)  |
| P(6)-C(65)-C(70)-C(69)  | -174.4(3) | P(2)-C(13)-P(1)-C(1)   | 118.5(2)  |
| C(76)-C(71)-C(72)-C(73) | 54.9(5)   | P(2)-C(13)-P(1)-C(7)   | -128.2(2) |
| P(6)-C(71)-C(72)-C(73)  | -175.8(3) | P(2)-C(13)-P(1)-Ag(1)  | -0.8(2)   |
| C(71)-C(72)-C(73)-C(74) | -56.2(6)  | C(12)-C(7)-P(1)-C(1)   | 176.3(3)  |
| C(72)-C(73)-C(74)-C(75) | 57.1(7)   | C(8)-C(7)-P(1)-C(1)    | 51.2(4)   |
| C(73)-C(74)-C(75)-C(76) | -56.9(6)  | C(12)-C(7)-P(1)-C(13)  | 63.9(4)   |
| C(74)-C(75)-C(76)-C(71) | 54.6(6)   | C(8)-C(7)-P(1)-C(13)   | -61.3(4)  |
| C(72)-C(71)-C(76)-C(75) | -53.4(5)  | C(12)-C(7)-P(1)-Ag(1)  | -59.3(4)  |
| P(6)-C(71)-C(76)-C(75)  | 176.0(4)  | C(8)-C(7)-P(1)-Ag(1)   | 175.6(3)  |
| O(2)-C(26)-O(1)-Ag(1)   | -16.9(11) | P(1)-C(13)-P(2)-C(20)  | 177.3(2)  |
| O(2)-C(26)-O(1)-Ag(1)#1 | 148.3(6)  | P(1)-C(13)-P(2)-C(14)  | 66.5(2)   |
| O(1)-C(26)-O(2)-Ag(2)   | -19.8(12) | P(1)-C(13)-P(2)-Ag(2)  | -56.2(2)  |
| O(5)-N(1)-O(3)-Ag(2)    | 178.4(3)  | C(21)-C(20)-P(2)-C(13) | 60.2(4)   |
| O(4)-N(1)-O(3)-Ag(2)    | -3.1(4)   | C(25)-C(20)-P(2)-C(13) | -175.9(4) |
| O(5)-N(1)-O(4)-Ag(2)    | -178.5(3) | C(21)-C(20)-P(2)-C(14) | 169.4(3)  |
| O(3)-N(1)-O(4)-Ag(2)    | 2.9(4)    | C(25)-C(20)-P(2)-C(14) | -66.8(4)  |
| O(8)-N(2)-O(6)-Ag(3)    | 21.8(6)   | C(21)-C(20)-P(2)-Ag(2) | -60.6(3)  |
| O(7)-N(2)-O(6)-Ag(3)    | -154.9(4) | C(25)-C(20)-P(2)-Ag(2) | 63.2(4)   |
| O(8)-N(2)-O(6)-Ag(6)    | 174.2(4)  | C(19)-C(14)-P(2)-C(13) | 75.6(3)   |
| O(7)-N(2)-O(6)-Ag(6)    | -2.5(6)   | C(15)-C(14)-P(2)-C(13) | -156.2(3) |
| O(10)-N(3)-O(9)-Ag(5)   | 0.2(6)    | C(19)-C(14)-P(2)-C(20) | -32.6(4)  |



|                        |           |                        |           |
|------------------------|-----------|------------------------|-----------|
| C(15)-C(14)-P(2)-C(20) | 95.5(3)   | P(3)-C(39)-P(4)-Ag(4)  | 18.4(3)   |
| C(19)-C(14)-P(2)-Ag(2) | -164.8(3) | P(6)-C(64)-P(5)-C(52)  | 144.1(2)  |
| C(15)-C(14)-P(2)-Ag(2) | -36.6(3)  | P(6)-C(64)-P(5)-C(58)  | -101.2(2) |
| C(34)-C(33)-P(3)-C(39) | -163.7(3) | P(6)-C(64)-P(5)-Ag(5)  | 21.4(3)   |
| C(38)-C(33)-P(3)-C(39) | 74.3(3)   | C(57)-C(52)-P(5)-C(64) | 166.9(3)  |
| C(34)-C(33)-P(3)-C(27) | -55.1(4)  | C(53)-C(52)-P(5)-C(64) | -72.0(3)  |
| C(38)-C(33)-P(3)-C(27) | -177.2(3) | C(57)-C(52)-P(5)-C(58) | 57.0(3)   |
| C(34)-C(33)-P(3)-Ag(3) | 70.7(3)   | C(53)-C(52)-P(5)-C(58) | 178.1(3)  |
| C(38)-C(33)-P(3)-Ag(3) | -51.4(3)  | C(57)-C(52)-P(5)-Ag(5) | -69.8(3)  |
| P(4)-C(39)-P(3)-C(33)  | -97.8(2)  | C(53)-C(52)-P(5)-Ag(5) | 51.3(3)   |
| P(4)-C(39)-P(3)-C(27)  | 150.3(2)  | C(59)-C(58)-P(5)-C(64) | 161.2(3)  |
| P(4)-C(39)-P(3)-Ag(3)  | 24.4(3)   | C(63)-C(58)-P(5)-C(64) | -68.7(3)  |
| C(28)-C(27)-P(3)-C(33) | -51.6(4)  | C(59)-C(58)-P(5)-C(52) | -88.6(3)  |
| C(32)-C(27)-P(3)-C(33) | -177.3(3) | C(63)-C(58)-P(5)-C(52) | 41.5(3)   |
| C(28)-C(27)-P(3)-C(39) | 57.3(4)   | C(59)-C(58)-P(5)-Ag(5) | 38.1(3)   |
| C(32)-C(27)-P(3)-C(39) | -68.5(3)  | C(63)-C(58)-P(5)-Ag(5) | 168.2(3)  |
| C(28)-C(27)-P(3)-Ag(3) | -175.6(3) | P(5)-C(64)-P(6)-C(71)  | 65.5(3)   |
| C(32)-C(27)-P(3)-Ag(3) | 58.7(3)   | P(5)-C(64)-P(6)-C(65)  | 179.2(2)  |
| C(47)-C(46)-P(4)-C(40) | -177.5(3) | P(5)-C(64)-P(6)-Ag(6)  | -56.4(2)  |
| C(51)-C(46)-P(4)-C(40) | -55.5(3)  | C(72)-C(71)-P(6)-C(64) | 68.6(3)   |
| C(47)-C(46)-P(4)-C(39) | 74.1(3)   | C(76)-C(71)-P(6)-C(64) | -162.3(3) |
| C(51)-C(46)-P(4)-C(39) | -163.9(3) | C(72)-C(71)-P(6)-C(65) | -40.7(3)  |
| C(47)-C(46)-P(4)-Ag(4) | -54.3(3)  | C(76)-C(71)-P(6)-C(65) | 88.4(3)   |
| C(51)-C(46)-P(4)-Ag(4) | 67.7(3)   | C(72)-C(71)-P(6)-Ag(6) | -166.9(2) |
| C(41)-C(40)-P(4)-C(46) | -179.6(3) | C(76)-C(71)-P(6)-Ag(6) | -37.8(3)  |
| C(45)-C(40)-P(4)-C(46) | -53.2(3)  | C(70)-C(65)-P(6)-C(64) | -176.1(3) |
| C(41)-C(40)-P(4)-C(39) | -71.2(3)  | C(66)-C(65)-P(6)-C(64) | 61.9(3)   |
| C(45)-C(40)-P(4)-C(39) | 55.1(3)   | C(70)-C(65)-P(6)-C(71) | -66.7(3)  |
| C(41)-C(40)-P(4)-Ag(4) | 59.1(3)   | C(66)-C(65)-P(6)-C(71) | 171.3(2)  |
| C(45)-C(40)-P(4)-Ag(4) | -174.5(2) | C(70)-C(65)-P(6)-Ag(6) | 58.3(3)   |
| P(3)-C(39)-P(4)-C(46)  | -104.4(2) | C(66)-C(65)-P(6)-Ag(6) | -63.6(3)  |
| P(3)-C(39)-P(4)-C(40)  | 145.3(2)  |                        |           |

---

Symmetry transformations used to generate equivalent atoms:

#1 -x,-y-1,-z+1
